# Supplementary material
Source: PubMed Central journal article supplement (PMC3329778)
Supplement: NIHMS294126-supplement-1_si_001.pdf [file NIHMS294126-supplement-1_si_001.pdf]

# Photosensitizer Drug Delivery via an Optical Fiber

Matibur Zamadar, Goutam Ghosh, Adaickapillai Mahendran, Mihaela Minnis,  
Bonnie I. Kruft, Ashwini Ghogare, David Aebisher, and Alexander Greer

*Department of Chemistry and Graduate Center, City University of New York,  
Brooklyn College, Brooklyn, New York 11210*

*Email: agreer@brooklyn.cuny.edu*

## *Supporting Information*

### **Table of Contents**

#### Page

|      |                                                                                                                                                                                                           |
|------|-----------------------------------------------------------------------------------------------------------------------------------------------------------------------------------------------------------|
| S1-2 | Table of Contents                                                                                                                                                                                         |
| S3   | Comparison of the absorption spectra of glass <b>1</b> and pheophorbide <b>11</b> . Figure S1:<br>Normalized absorption spectra of glass <b>1</b> in air, and <b>11</b> in acetonitrile and toluene.      |
| S4-5 | Synthetic procedures of 1,2-bis(4-bromophenoxy)ethane ( <b>6</b> ), <i>meso</i> -1,2-dibromo-1,2-<br>bis(4-bromophenoxy)-ethane ( <b>7</b> ), and <i>cis</i> -1,2-bis(4-bromophenoxy)ethene ( <b>8</b> ). |
| S6-7 | Figure S2: HRMS of 4-(formyloxy)benzyl-pyropheophorbide ( <b>3</b> ).                                                                                                                                     |
| S8   | Figure S3: <sup>1</sup> H NMR of 1,2-bis(4-bromophenoxy)ethane ( <b>6</b> ) in CDCl <sub>3</sub> .                                                                                                        |
| S9   | Figure S4: <sup>13</sup> C NMR of 1,2-bis(4-bromophenoxy)ethane ( <b>6</b> ) in CDCl <sub>3</sub> .                                                                                                       |
| S10  | Figure S5: <sup>1</sup> H NMR of <i>meso</i> -1,2-dibromo-1,2-bis(4-bromophenoxy)-ethane ( <b>7</b> ) in CDCl <sub>3</sub> .                                                                              |
| S11  | Figure S6: <sup>13</sup> C NMR of <i>meso</i> -1,2-bibromo-1,2-bis(4-bromophenoxy)-ethane ( <b>7</b> ) in<br>CDCl <sub>3</sub> .                                                                          |
| S12  | Figure S7: <sup>1</sup> H NMR of <i>cis</i> -1,2-bis(4-bromophenoxy)ethene ( <b>8</b> ) in CDCl <sub>3</sub> .                                                                                            |
| S13  | Figure S8: <sup>13</sup> C NMR of <i>cis</i> -1,2-bis(4-bromophenoxy)ethene ( <b>8</b> ) in CDCl <sub>3</sub> .                                                                                           |
| S14  | Figure S9: <sup>1</sup> H NMR of ( <i>Z</i> )-4,4'-(ethene-1,2-diylbis(oxy))dibenzaldehyde ( <b>9</b> ) in CDCl <sub>3</sub> .                                                                            |

- S15 Figure S10:  $^{13}\text{C}$  NMR of (Z)-4,4'-(ethene-1,2-diylbis(oxy))dibenzaldehyde (**9**) in  $\text{CDCl}_3$ .
- S16 Figure S11: HRMS of (Z)-4,4'-(ethene-1,2-diylbis(oxy))dibenzaldehyde (**9**).
- S17 Figure S12:  $^1\text{H}$  NMR of (Z)-(4,4'-(ethene-1,2-diylbis(oxy))bis(1,4-phenylene))-dimethanol (**10**) in  $\text{CDCl}_3$ .
- S18 Figure S13:  $^{13}\text{C}$  NMR of (Z)-(4,4'-(ethene-1,2-diylbis(oxy))bis(1,4-phenylene))-dimethanol (**10**) in  $\text{CDCl}_3$ .
- S19 Figure S14: HRMS of (Z)-(4,4'-(ethene-1,2-diylbis(oxy))bis(1,4-phenylene))-dimethanol (**10**).
- S20 Figure S15:  $^1\text{H}$  NMR of (Z)-4-[2-(4-hydroxymethyl-phenoxy)-vinyl]oxy]-benzyl-pyropheophorbide (**11**) in  $\text{CDCl}_3$ .
- S21 Figure S16:  $^{13}\text{C}$  NMR of (Z)-4-[2-(4-hydroxymethyl-phenoxy)-vinyl]oxy]-benzyl-pyropheophorbide (**11**) in  $\text{CDCl}_3$ .
- S22 Figure S17: HRMS of (Z)-4-[2-(4-hydroxymethyl-phenoxy)-vinyl]oxy]-benzyl-pyropheophorbide (**11**).
- S23 Figure S18: HRMS of 4-hydroxybenzyl-pyropheophorbide (**13**).
- S24 Figure S19: HRMS of pyropheophorbide-*a* (**14**).
- S25 Figure S20: Images taken at 4 $\times$  magnification with the epifluorescence microscope of the diffusion of photosensitizer **3** away from glass cap into petrolatum at 65  $^\circ\text{C}$  at 0, 30 and 60 min with white light irradiation through the fiber optic device.
- S26 References

### Comparison of the Absorption Spectra of Glass **1** and Pheophorbide **11**.

The absorption spectrum of glass **1** had (i) an intensity increase, (ii) broadening of the Soret and Q-bands, and (iii) 4<sup>th</sup> Q-band 666 nm red shift (1 nm) and blue shift (3 nm) relative to sensitizer **11** in acetonitrile and toluene, respectively (Figure S1). Polívka et al. showed that the 4<sup>th</sup> Q-band of pheophorbide derivatives shifted red/blue region depending on the polarity of solvent, e.g., the 4<sup>th</sup> Q-band was at 665 nm in acetonitrile and at 671 nm in benzene.<sup>1</sup> Absorption intensity increases and red and blue shifting of Q-bands based on solvent polarity have been observed for 5,10,15,20-tetra(4-(trimethyl-ammonio)phenyl)-21H,23H-porphine tetratosylate and for 5,10,15,20-tetra(1-methyl-4-pyridyl)-21H,23H-porphine tetratosylate encapsulated in monolithic sol-gel glass,<sup>2</sup> and the surface polarity of a monolithic silica gel glass is suggested to be between methanol and water.<sup>3</sup> Thus, we concluded that the probe tip surface **1** has a polarity similar to acetonitrile.

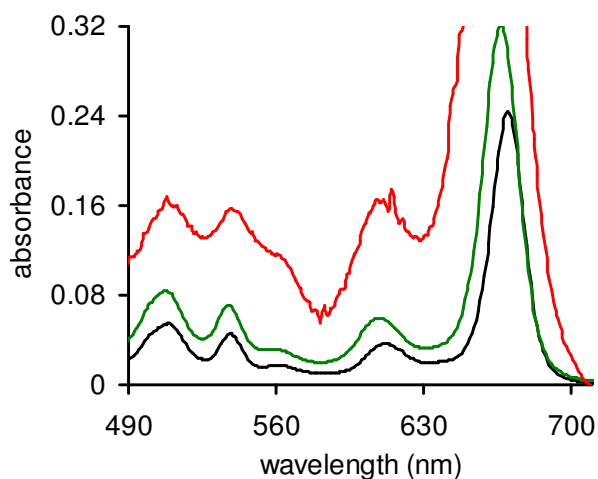

**Figure S1.** Normalized absorption spectra of functionalized glass **1** in air (red line), and **11** in acetonitrile (green line) and toluene (black line). The  $Q_x(0,1)$ ,  $Q_x(0,0)$ ,  $Q_y(0,1)$ , and  $Q_y(0,0)$  bands can be seen (l to r).

## Synthetic Procedure of Known Compounds 6-8<sup>4</sup>

**1,2-Bis(4-bromophenoxy)ethane (6).** Yield 32.7 grams (57%). To a solution of sodium hydroxide (12.4 g, 0.31 mol) in water (50 mL) was added 4-bromophenol (51.7 g, 0.3 mol). The mixture was stirred at 60-70 °C for 0.5 h followed by addition of 1,2-dibromoethane (26.3 g, 0.14 mol). The resulting mixture was then refluxed for 6 h at 100 °C. After cooling, the white solid was separated from the reaction mixture by filtration at room temperature. The solid was purified by recrystallization from ethanol and dried in vacuo (mp 130-132 °C). <sup>1</sup>H NMR (400 MHz, CDCl<sub>3</sub>) δ 7.38 (d, *J* = 8.9 Hz, 4H), 6.82 (d, *J* = 8.9 Hz, 4H), 4.27 (s, 4H); <sup>13</sup>C NMR (100 MHz, CDCl<sub>3</sub>) δ 157.7, 132.3, 116.5, 113.4, 66.7; (lit. data for **6**, ref 4): mp 130-132 °C; <sup>1</sup>H NMR (250 MHz, CDCl<sub>3</sub>) δ 7.37(d, *J* = 6.8 Hz, 4H), 6.81 (d, *J* = 6.8 Hz, 4H), 4.25 (s, 4H); <sup>13</sup>C NMR (63 MHz, CDCl<sub>3</sub>) δ 157.5, 132.3, 116.5, 113.4, 66.7.

**meso-1,2-Dibromo-1,2-bis(4-bromophenoxy)-ethane (meso-7).** Yield *meso-7*, 0.82 g (17%). In 50 mL of carbon tetrachloride was dissolved 3.37 g (9.06 mmol) **6**, 3.95 g (22.19 mmol) of *N*-bromosuccinimide, and 0.54 g (2.23 mmol) of benzoyl peroxide. The resulting solution was refluxed at 80 °C for 6 h. After cooling to room temperature, the mixture was filtered and the crude products obtained from the filtrate by evaporating the solvent. The crude product was purified by silica gel chromatography (230-400 mesh; 6:1 hexane/ dichloromethane) yielded pure *meso*- and *dl-7*. Silica gel chromatography was used to separate *meso-7* from *dl-7* (mp of *meso-7* 140-142 °C). mp (*meso-7*) 140-142 °C; <sup>1</sup>H NMR (400 MHz, CDCl<sub>3</sub>) δ 7.51 (d, *J* = 9.0 Hz, 4H), 7.08 (d, *J* = 9.0 Hz, 4H), 6.50 (s, 2H); <sup>13</sup>C NMR (100 MHz, CDCl<sub>3</sub>) δ 154.2, 132.9, 118.9, 117.4, 85.3; (lit. data for **7**, ref 4): mp 140-142 °C; <sup>1</sup>H NMR (500 MHz, CDCl<sub>3</sub>) δ 7.51 (dd, *J* = 8.9, 1.2 Hz, 4H), 7.08 (dd, *J* = 8.9, 1.2 Hz, 4H), 6.51 (s, *J* = 6.2 Hz, 2H); <sup>13</sup>C NMR (250 MHz, CDCl<sub>3</sub>) δ 153.7, 132.9, 118.9, 117.0, 85.3.

***cis*-1,2-Bis(4-bromophenoxy)ethene (*cis*-8).** Yield 0.35g (95%). *Meso*-7 (0.54 g, 1.02 mmol) was dissolved in 20 mL acetone, followed by an addition of sodium iodide (0.45 g, 3 mmol). The reaction mixture was stirred for 2 h at room temperature and developed a deep red color. The solvent was evaporated in rotary vap. followed by the addition of water (25 mL) and dichloromethane (100 mL) with continuous stirring. A saturated aqueous solution of sodium thiosulfate was added until the solution became colorless. The organic layer was separated, dried over anhydrous NaSO<sub>4</sub>, and evaporated. The solid was purified by recrystallization from ethanol to obtain *cis*-8 (mp: 102-105 °C) <sup>1</sup>H NMR (400 MHz, CDCl<sub>3</sub>) δ 7.42 (d, *J* = 9.0 Hz, 4H), 6.97 (d, *J* = 9.0, 4H), 6.11 (s, 2H); <sup>13</sup>C NMR (100 MHz, CDCl<sub>3</sub>) δ 156.3, 132.6, 128.5, 118.0, 115.4; (lit. data for **8**, ref 4): mp 102-104 °C; <sup>1</sup>H NMR (500 MHz, CDCl<sub>3</sub>) δ 7.42 (d, *J* = 9.0 Hz, 4H), 6.97 (d, *J* = 9.0, 4H), 6.11 (s, 2H); <sup>13</sup>C NMR (250 MHz, CDCl<sub>3</sub>) δ 156.3, 132.5, 128.5, 118.0, 115.4.

## Qualitative Compound Report

Data File: AM20101101\_013.d      Sample Name: P1-F1  
Sample Type: Sample      Position: P1-F1  
Instrument Name: Instrument 1      User Name:  
Acq Method:      IRM Calibration Status: Success  
DA Method:      Comment: CF =      EM =

### Compound Table

| Compound Label             | RT   | Mass      | Abund | Formula       | Tgt Mass  | Diff (ppm) |
|----------------------------|------|-----------|-------|---------------|-----------|------------|
| Cpd 1: C41 H40 N4 O5; 2.26 | 2.26 | 668.29972 | 3235  | C41 H40 N4 O5 | 668.29987 | -0.22      |
| Cpd 2: C40 H40 N4 O4; 2.08 | 2.08 | 640.30482 | 5088  | C40 H40 N4 O4 | 640.30496 | -0.22      |

| Compound Label             | RT   | Algorithm       | Mass      |
|----------------------------|------|-----------------|-----------|
| Cpd 1: C41 H40 N4 O5; 2.26 | 2.26 | Find By Formula | 668.29972 |

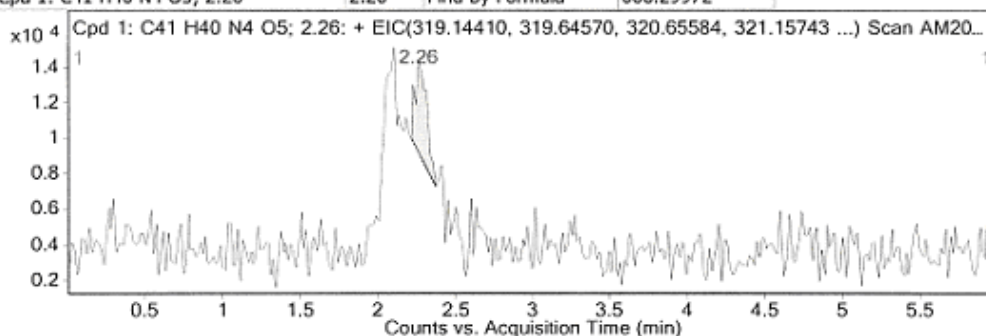

### MS Spectrum

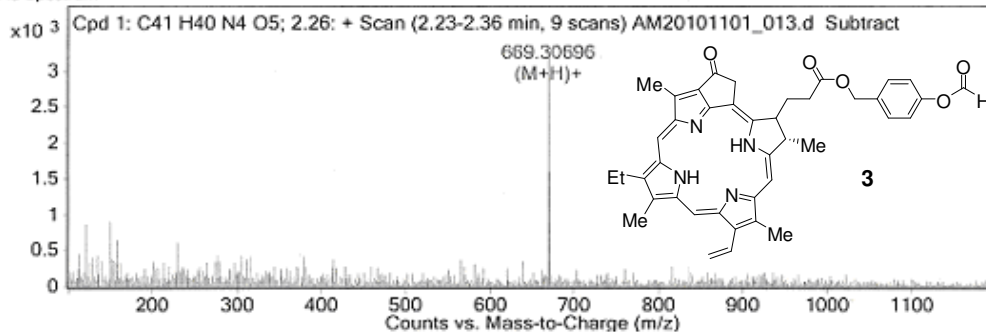

### MS Zoomed Spectrum

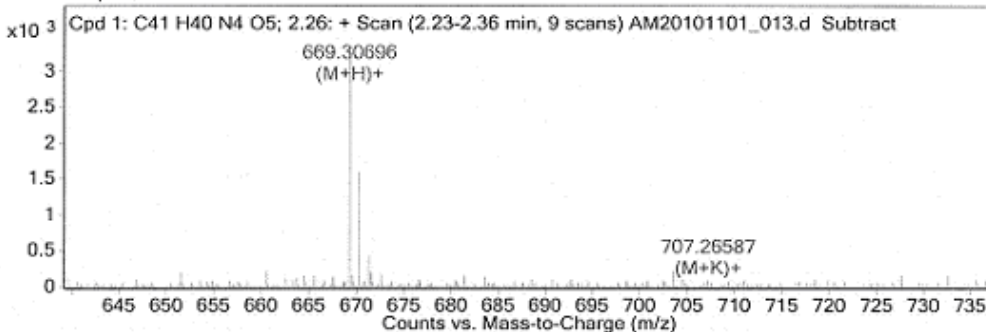

Figure S2. HRMS of 4-(formyloxy)benzyl-pyropheophorbide (**3**).

## Qualitative Compound Report

### MS Spectrum Peak List

| <i>m/z</i> | <i>Calc m/z</i> | Diff(ppm) | <i>z</i> | Abund | Formula         | Ion    |
|------------|-----------------|-----------|----------|-------|-----------------|--------|
| 664.50646  |                 |           |          | 161   |                 |        |
| 665.51901  |                 |           |          | 157   |                 |        |
| 667.59961  |                 |           |          | 146   |                 |        |
| 669.30696  | 669.30715       | -0.29     |          | 3235  | C41 H41 N4 O5   | (M+H)+ |
| 669.60066  |                 |           |          | 175   |                 |        |
| 670.3105   | 670.31034       | 0.25      |          | 1592  | C41 H41 N4 O5   | (M+H)+ |
| 671.31476  | 671.31333       | 2.13      |          | 442   | C41 H41 N4 O5   | (M+H)+ |
| 671.53912  |                 |           |          | 203   |                 |        |
| 672.59577  |                 |           |          | 160   |                 |        |
| 707.26587  | 707.26303       | 4.02      | 1        | 81    | C41 H40 K N4 O5 | (M+K)+ |

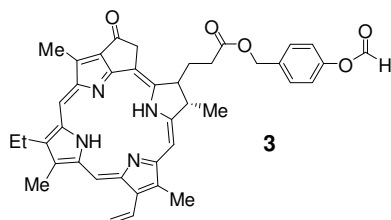

**Figure S2. contd.** HRMS of 4-(formyloxy)benzyl-pyropheophorbide (**3**).

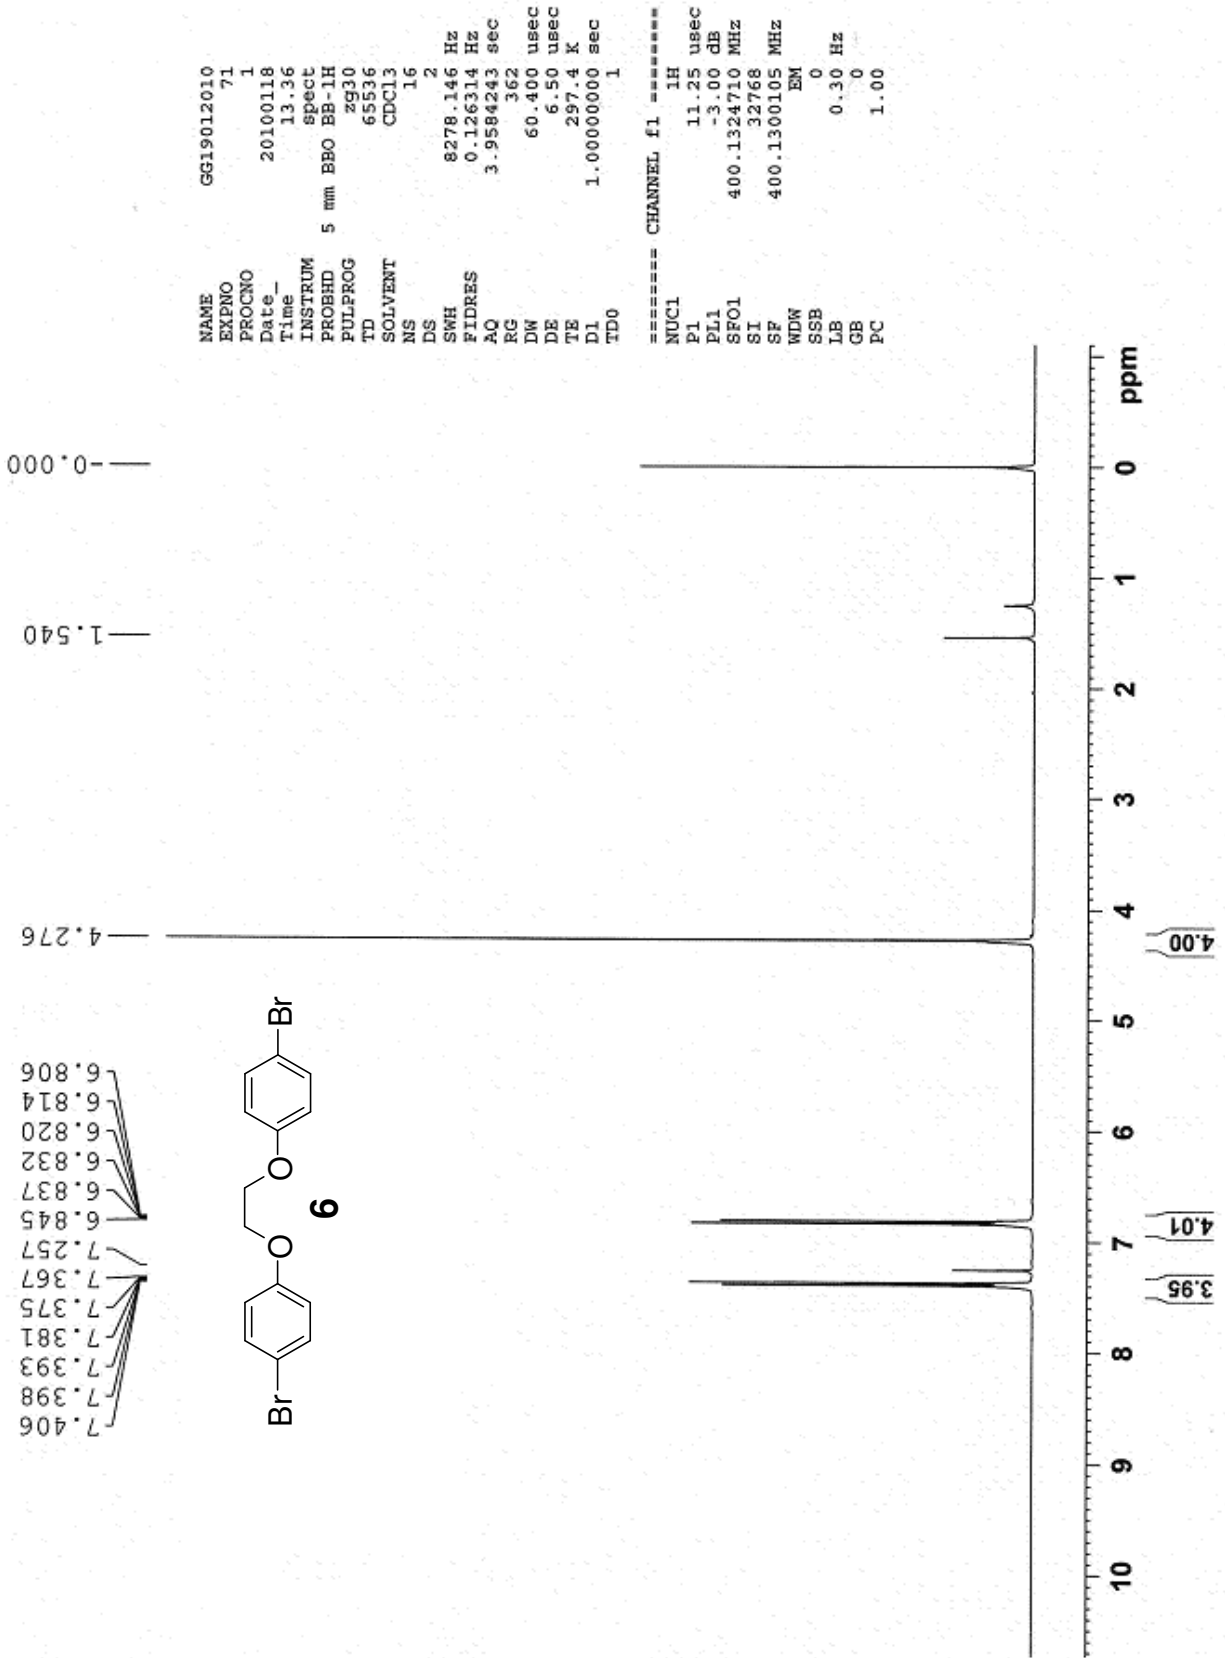

Figure S3. <sup>1</sup>H NMR of 1,2-bis(4-bromophenoxy)ethane (6) in CDCl<sub>3</sub>.



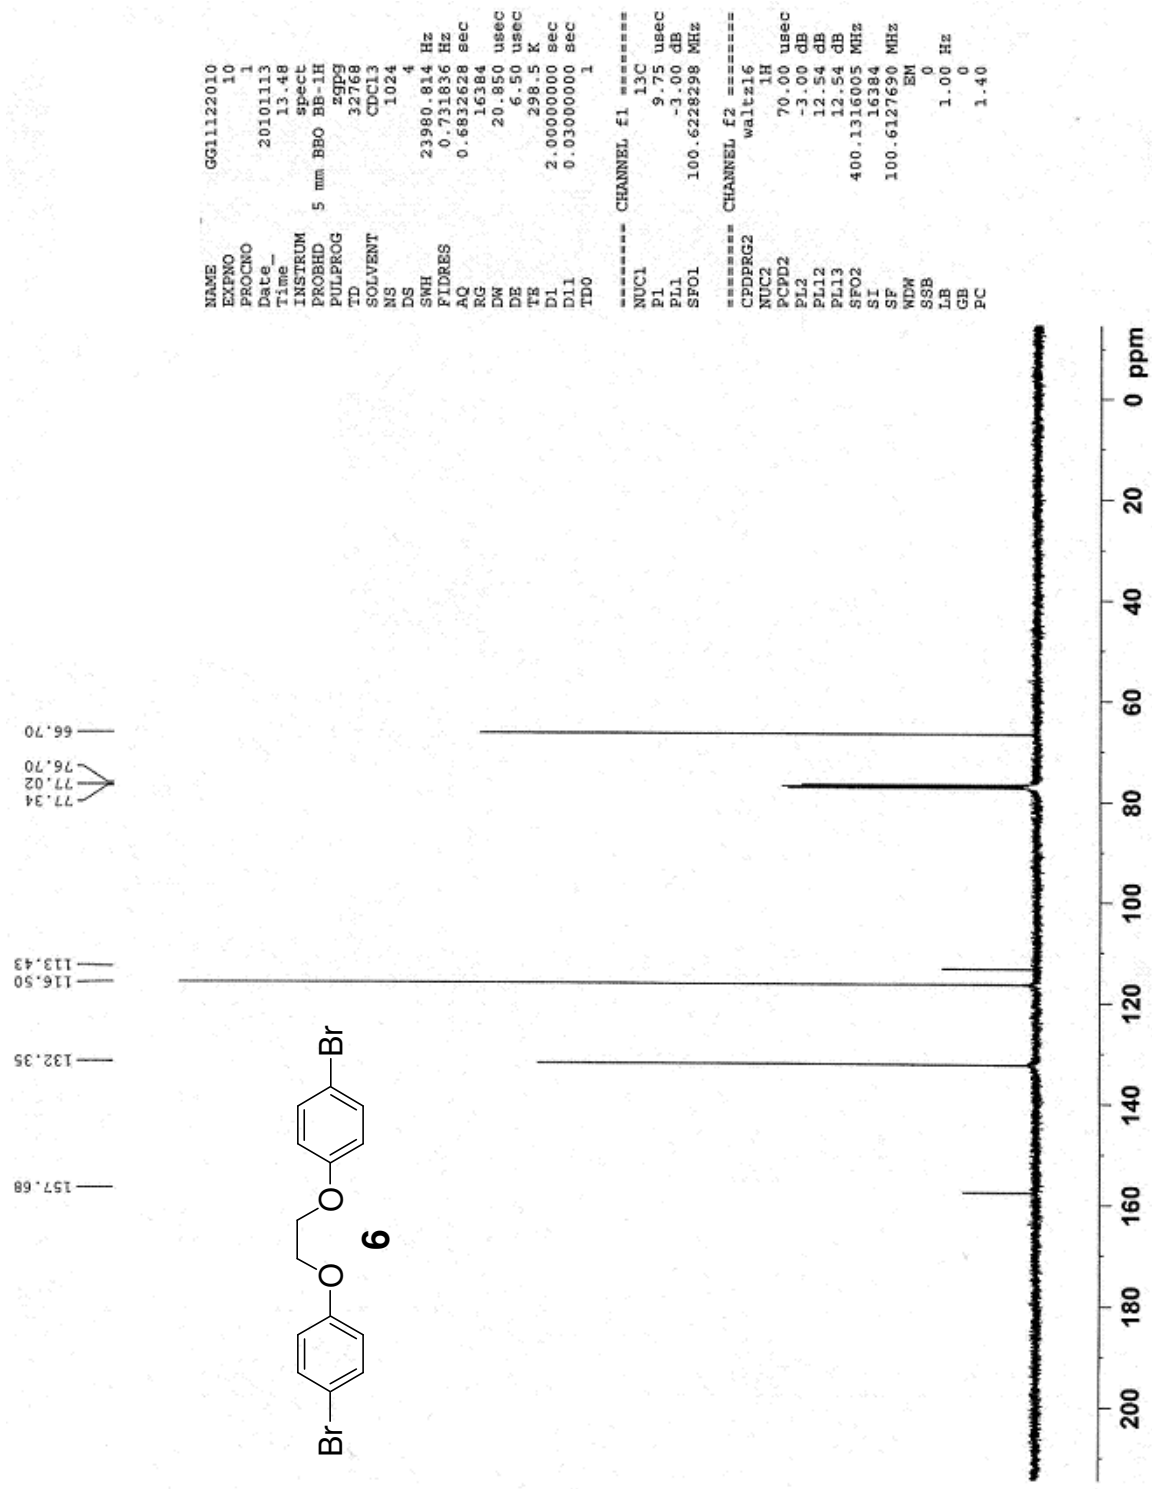

```

NAME          GG1122010
EXPNO         10
PROCNO        1
Date_         20101113
Time          13.48
INSTRUM       spect
PROBHD        5 mm BBO BB-IH
PULPROG       zgpg
TD            32768
SOLVENT       CDCl3
NS            1024
DS            4
SWH           23980.814 Hz
FIDRES        0.731836 Hz
AQ            0.6832628 sec
RG            16384
DE            20.850 usec
TE            298.5 K
D1            2.00000000 sec
DL1           0.03000000 sec
TDO           1
===== CHANNEL f1 =====
NUC1          13C
P1            9.75 usec
PL1           -1.00 dB
SFO1          100.6228298 MHz
===== CHANNEL f2 =====
CFDPRG2       waitz16
NUC2          1H
PCPD2         70.00 usec
PL2           -3.00 dB
PL12          12.54 dB
PL13          12.54 dB
SFO2          400.1316005 MHz
SI            16384
SF            100.6127690 MHz
WDW           EM
SSB           0
LB            1.00 Hz
GB            0
PC            1.40

```

Figure S4. <sup>13</sup>C NMR of 1,2-bis(4-bromophenoxy)ethane (6) in CDCl<sub>3</sub>.

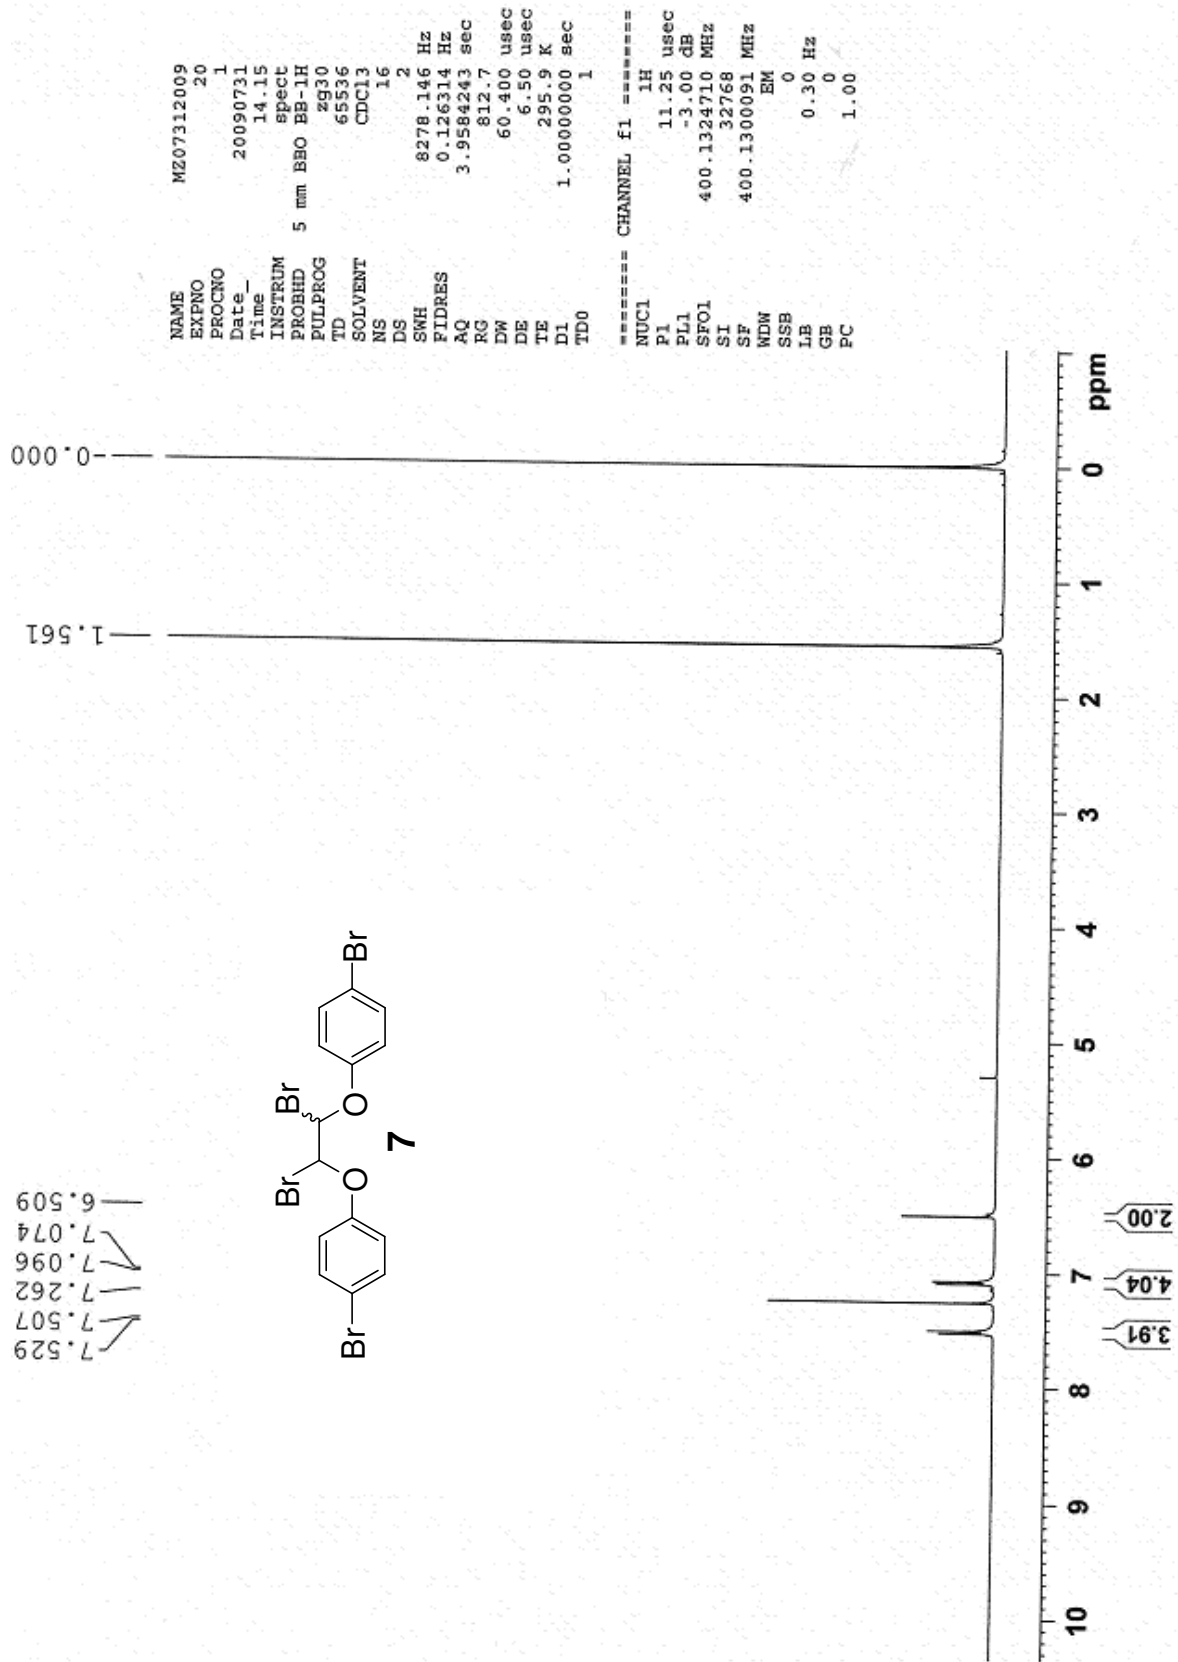

Figure S5. <sup>1</sup>H NMR of *meso*-1,2-dibromo-1,2-bis(4-bromophenoxy)-ethane (**7**) in CDCl<sub>3</sub>.

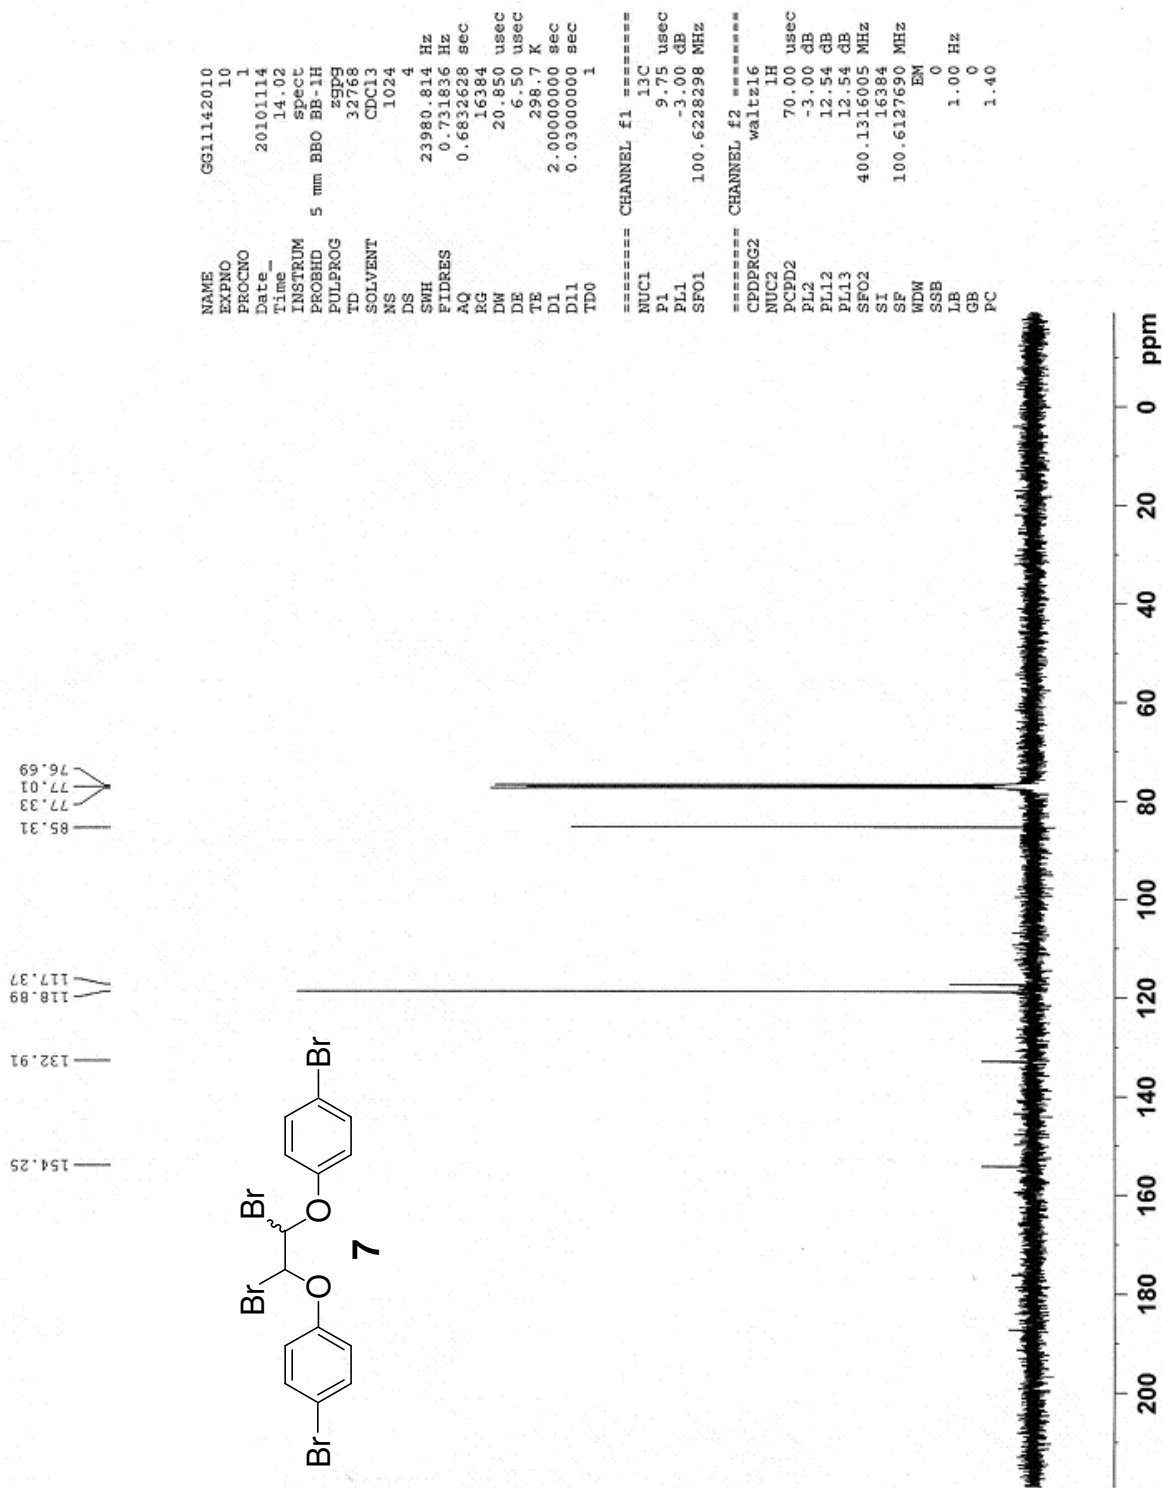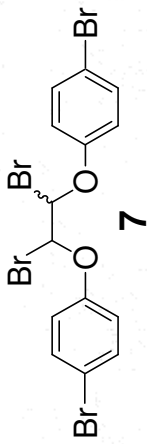

Figure S6. <sup>13</sup>C NMR of *meso*-1,2-dibromo-1,2-bis(4-bromophenoxy)-ethane (**7**) in CDCl<sub>3</sub>.

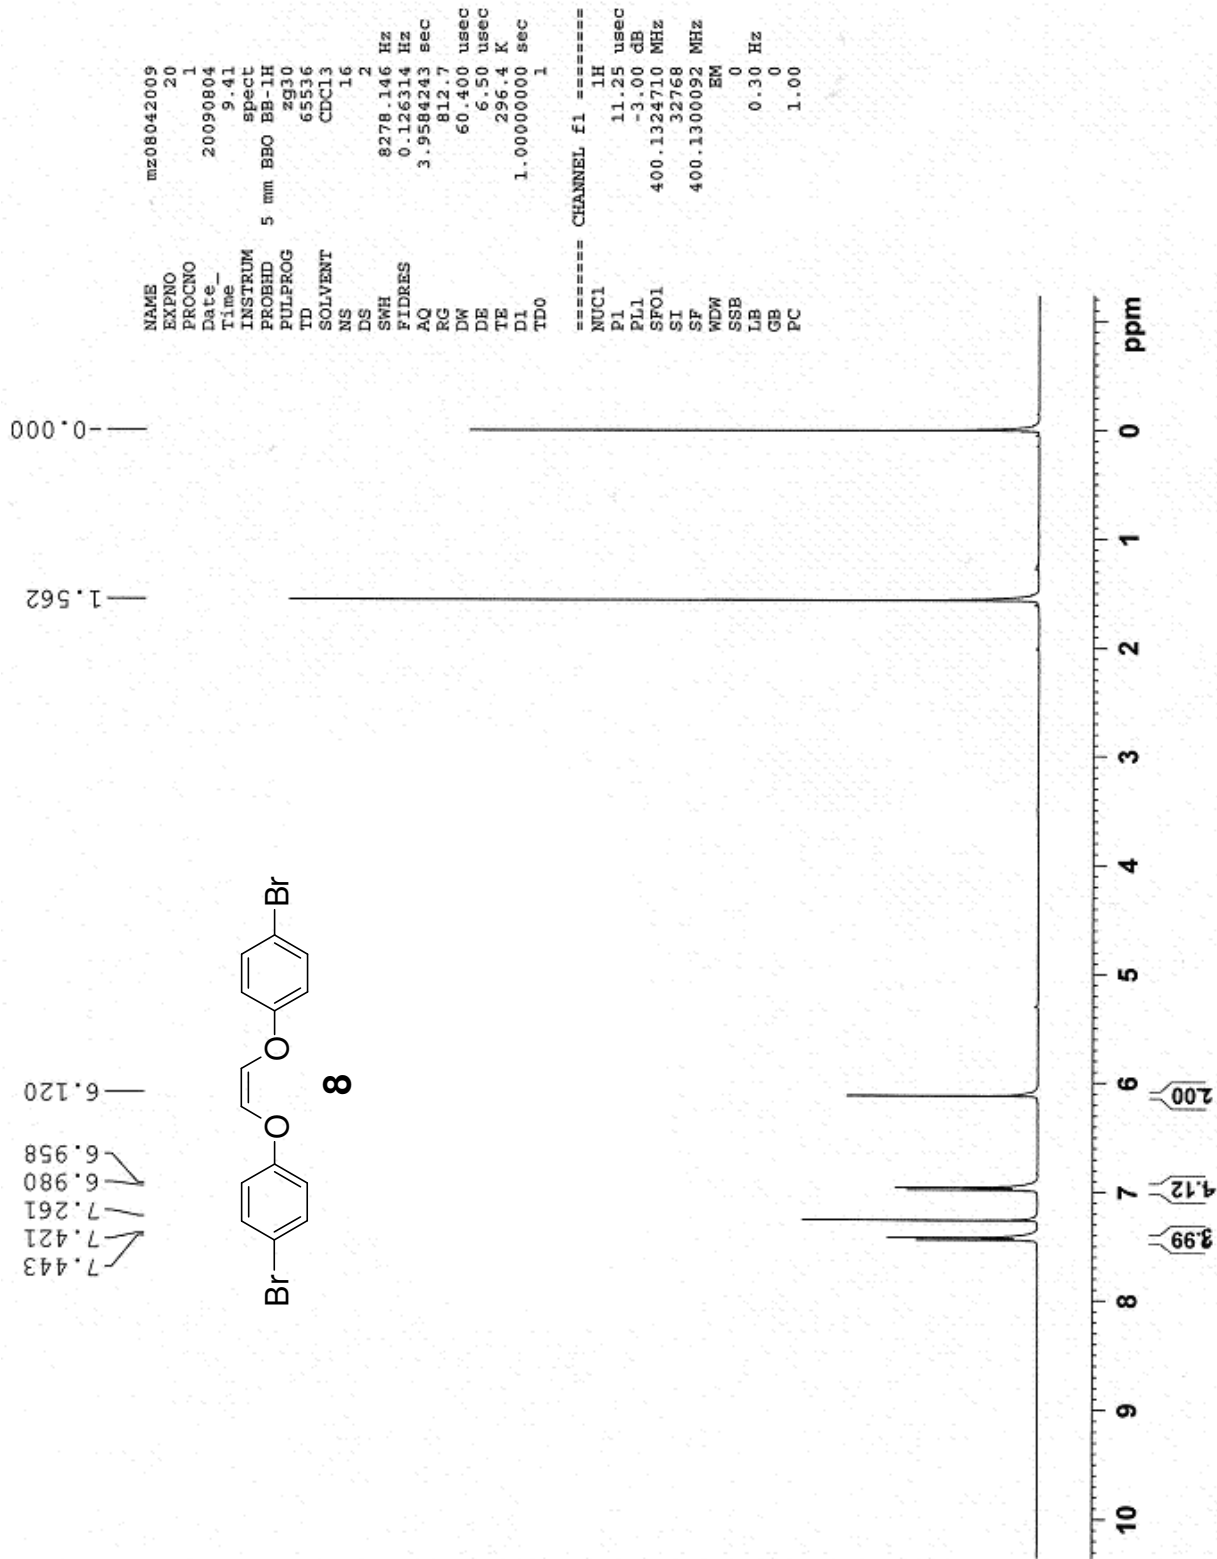

Figure S7. <sup>1</sup>H NMR of *cis*-1,2-bis(4-bromophenoxy)ethene (**8**) in CDCl<sub>3</sub>.

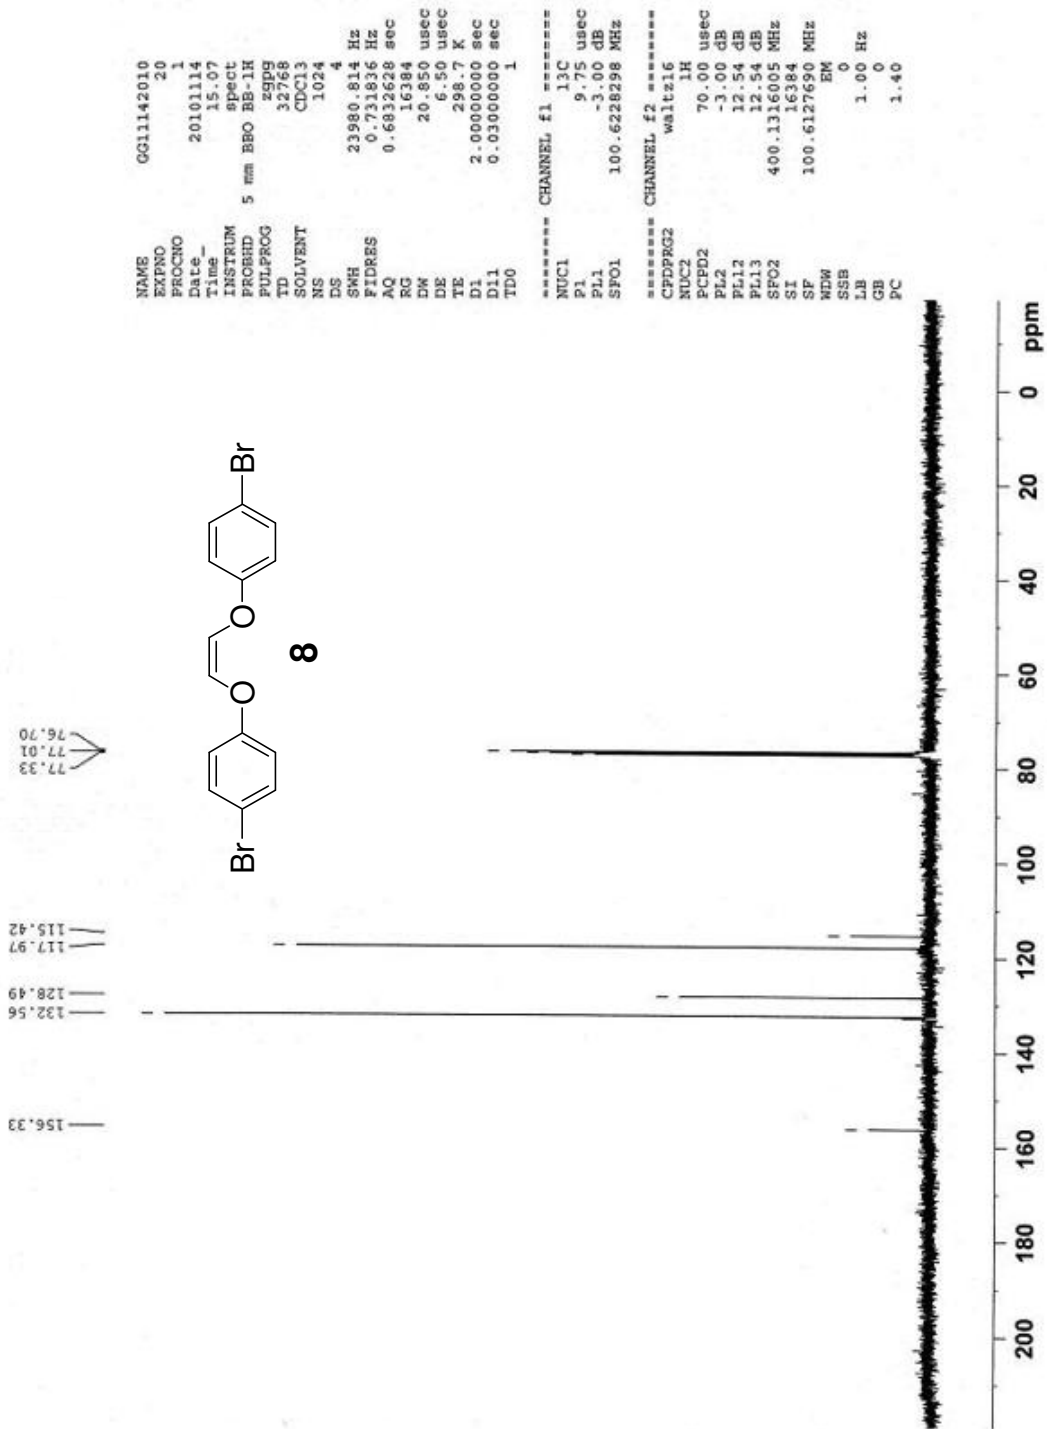

Figure S8. <sup>13</sup>C NMR of *cis*-1,2-bis(4-bromophenoxy)ethene (**8**) in CDCl<sub>3</sub>.

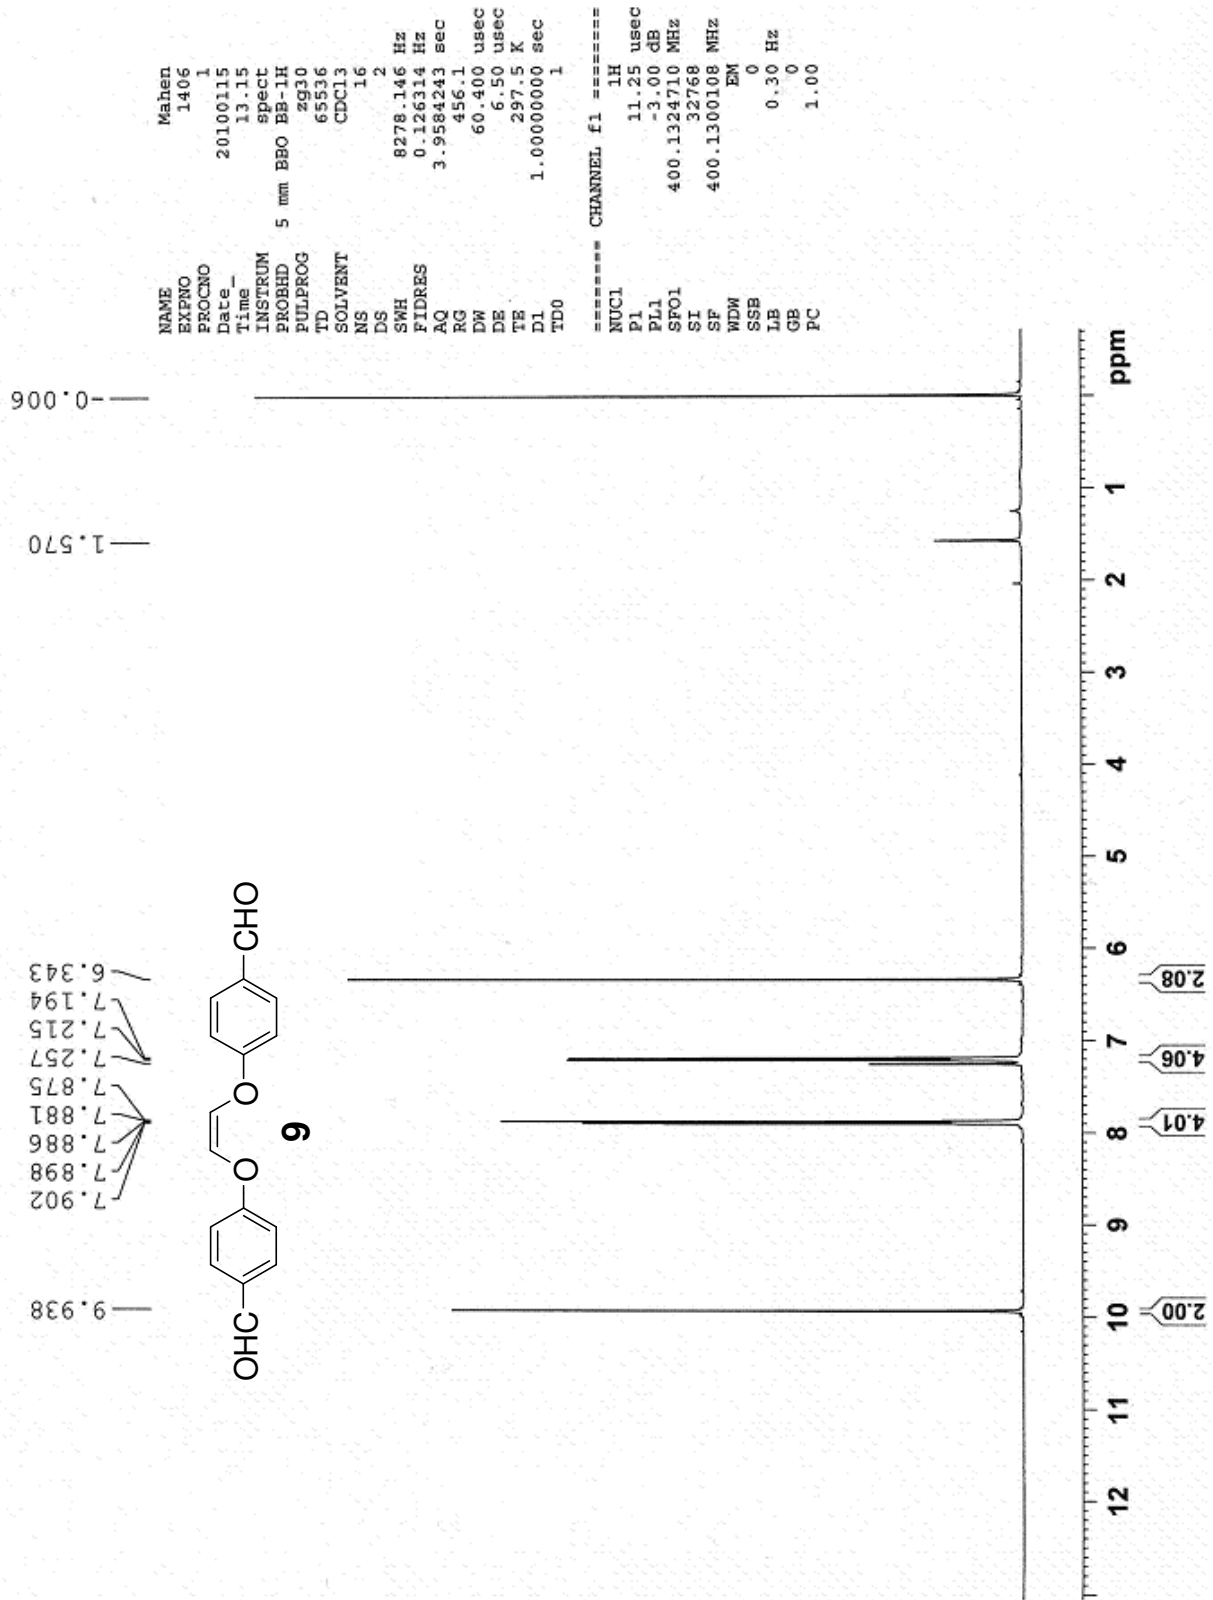

Figure S9. <sup>1</sup>H NMR of (Z)-4,4'-(ethene-1,2-diylbis(oxy))dibenzaldehyde (**9**) in CDCl<sub>3</sub>.

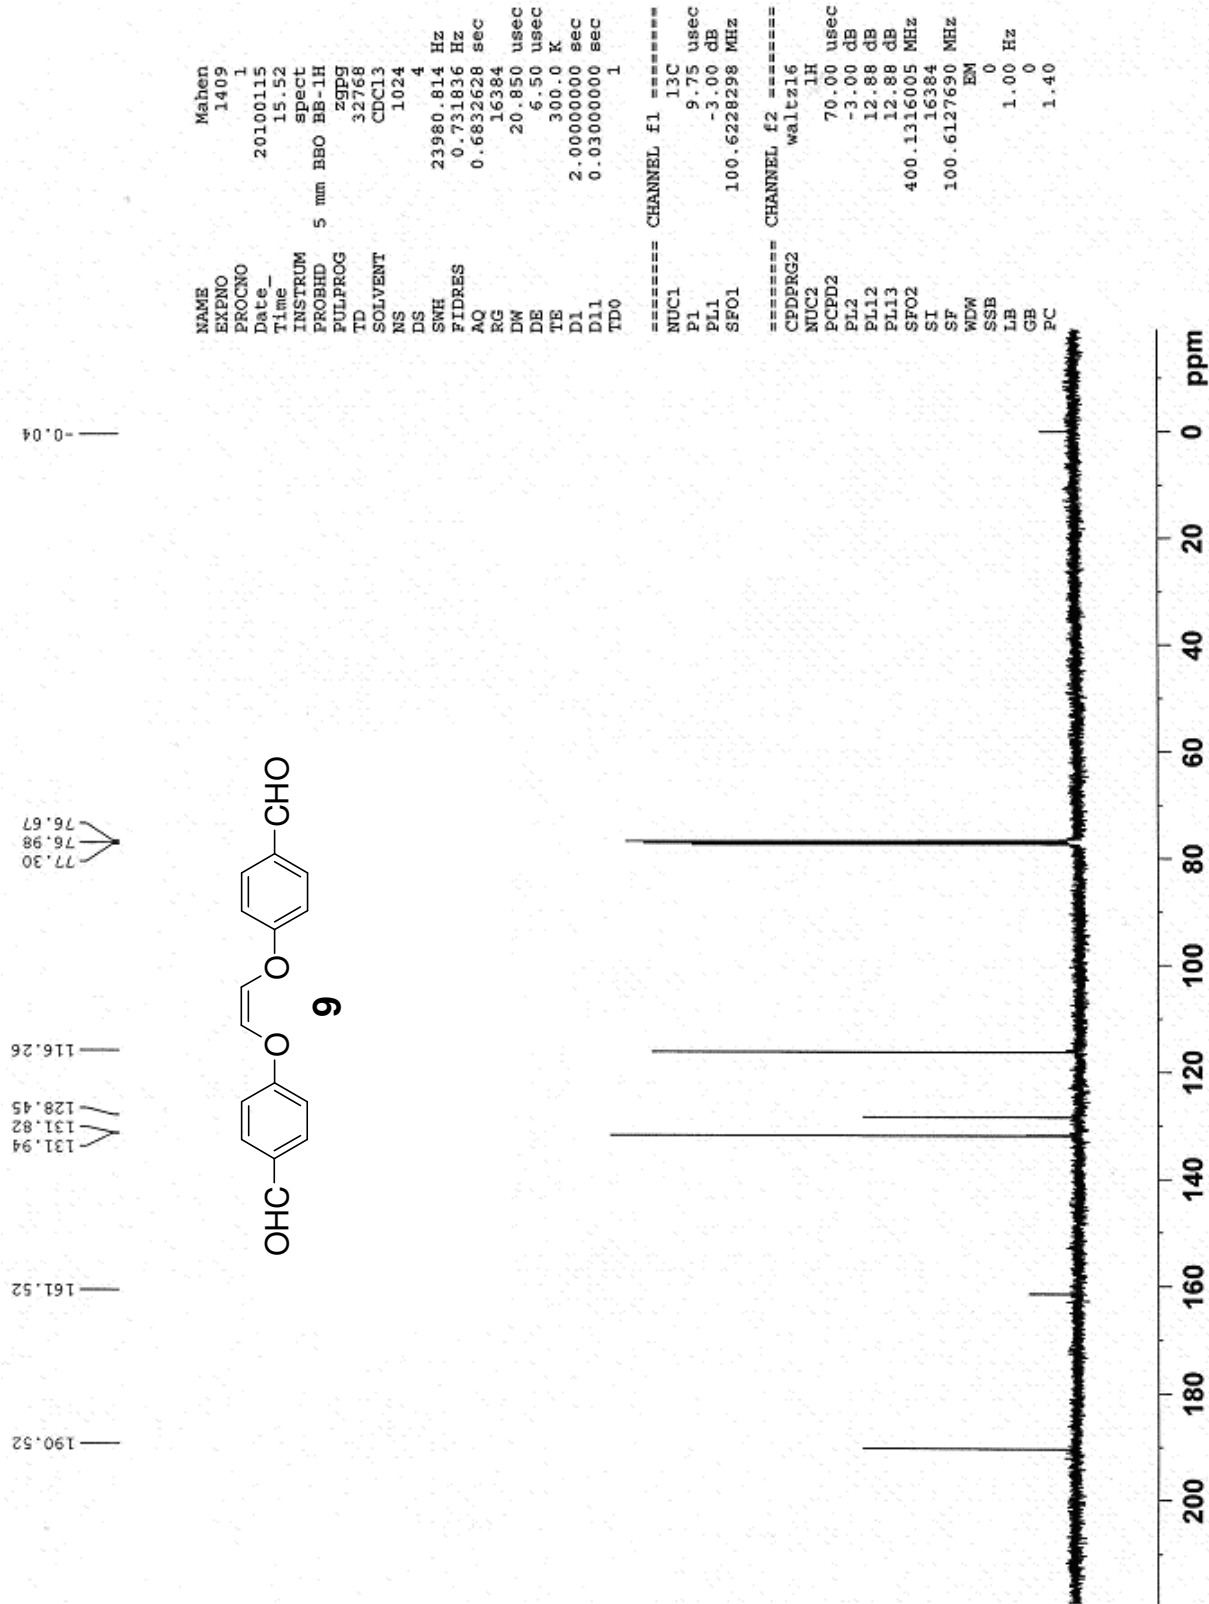

**Figure S10.** <sup>13</sup>C NMR of (Z)-4,4'-(ethene-1,2-diylbis(oxy))dibenzaldehyde (9) in CDCl<sub>3</sub>.

## Qualitative Compound Report

|                 |                  |                        |                            |
|-----------------|------------------|------------------------|----------------------------|
| Data File       | MZ20090922_003.d | Sample Name            | Sample 1                   |
| Sample Type     | Sample           | Position               | P1-C8                      |
| Instrument Name | Instrument 1     | User Name              |                            |
| Acq Method      |                  | IRM Calibration Status | Success                    |
| DA Method       | MahenMethod1.m   | Comment                | Formylated cis alkene pure |

Fragmentor Voltage 175    Collision Energy 0    Ionization Mode Esi

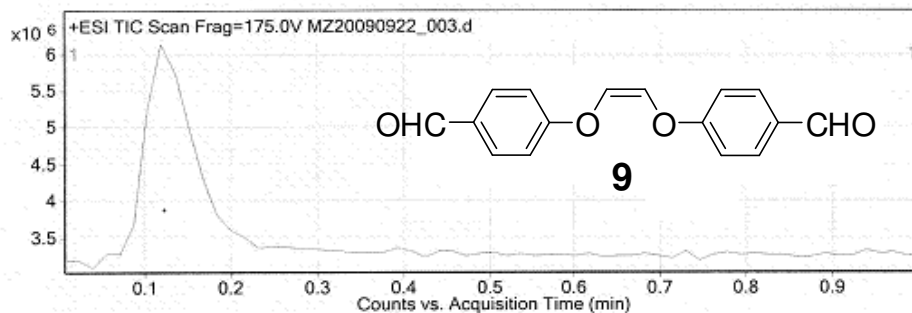

Compound Table

| Compound Label    | RT    | Mass     | MFG Formula | MFG Diff (ppm) |
|-------------------|-------|----------|-------------|----------------|
| Cpd 1: C16 H12 O4 | 0.127 | 268.0732 | C16 H12 O4  | 1.26           |

| Compound Label    | RT    | Algorithm                 | Mass     |
|-------------------|-------|---------------------------|----------|
| Cpd 1: C16 H12 O4 | 0.127 | Find by Molecular Feature | 268.0732 |

MS Zoomed Spectrum

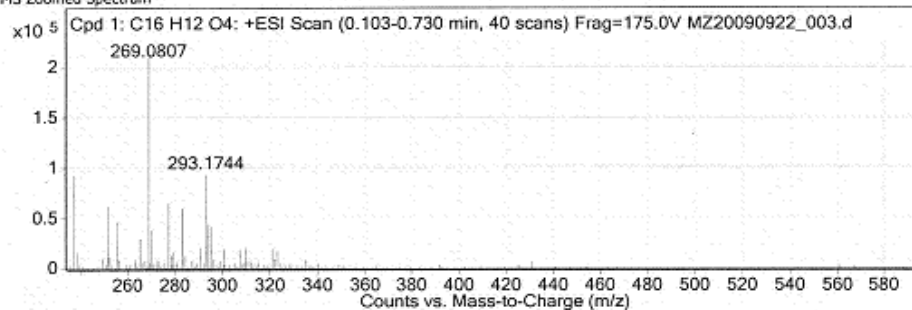

MS Spectrum Peak List

| m/z      | z | Abund   | Formula       | Ion     |
|----------|---|---------|---------------|---------|
| 269.0805 | 1 | 2020735 | C16 H13 O4    | (M+H)+  |
| 293.0713 | 1 | 5013    | C16 H12 Na O4 | (M+Na)+ |

**Figure S11.** HRMS of (Z)-4,4'-(ethene-1,2-diylbis(oxy))dibenzaldehyde (**9**).



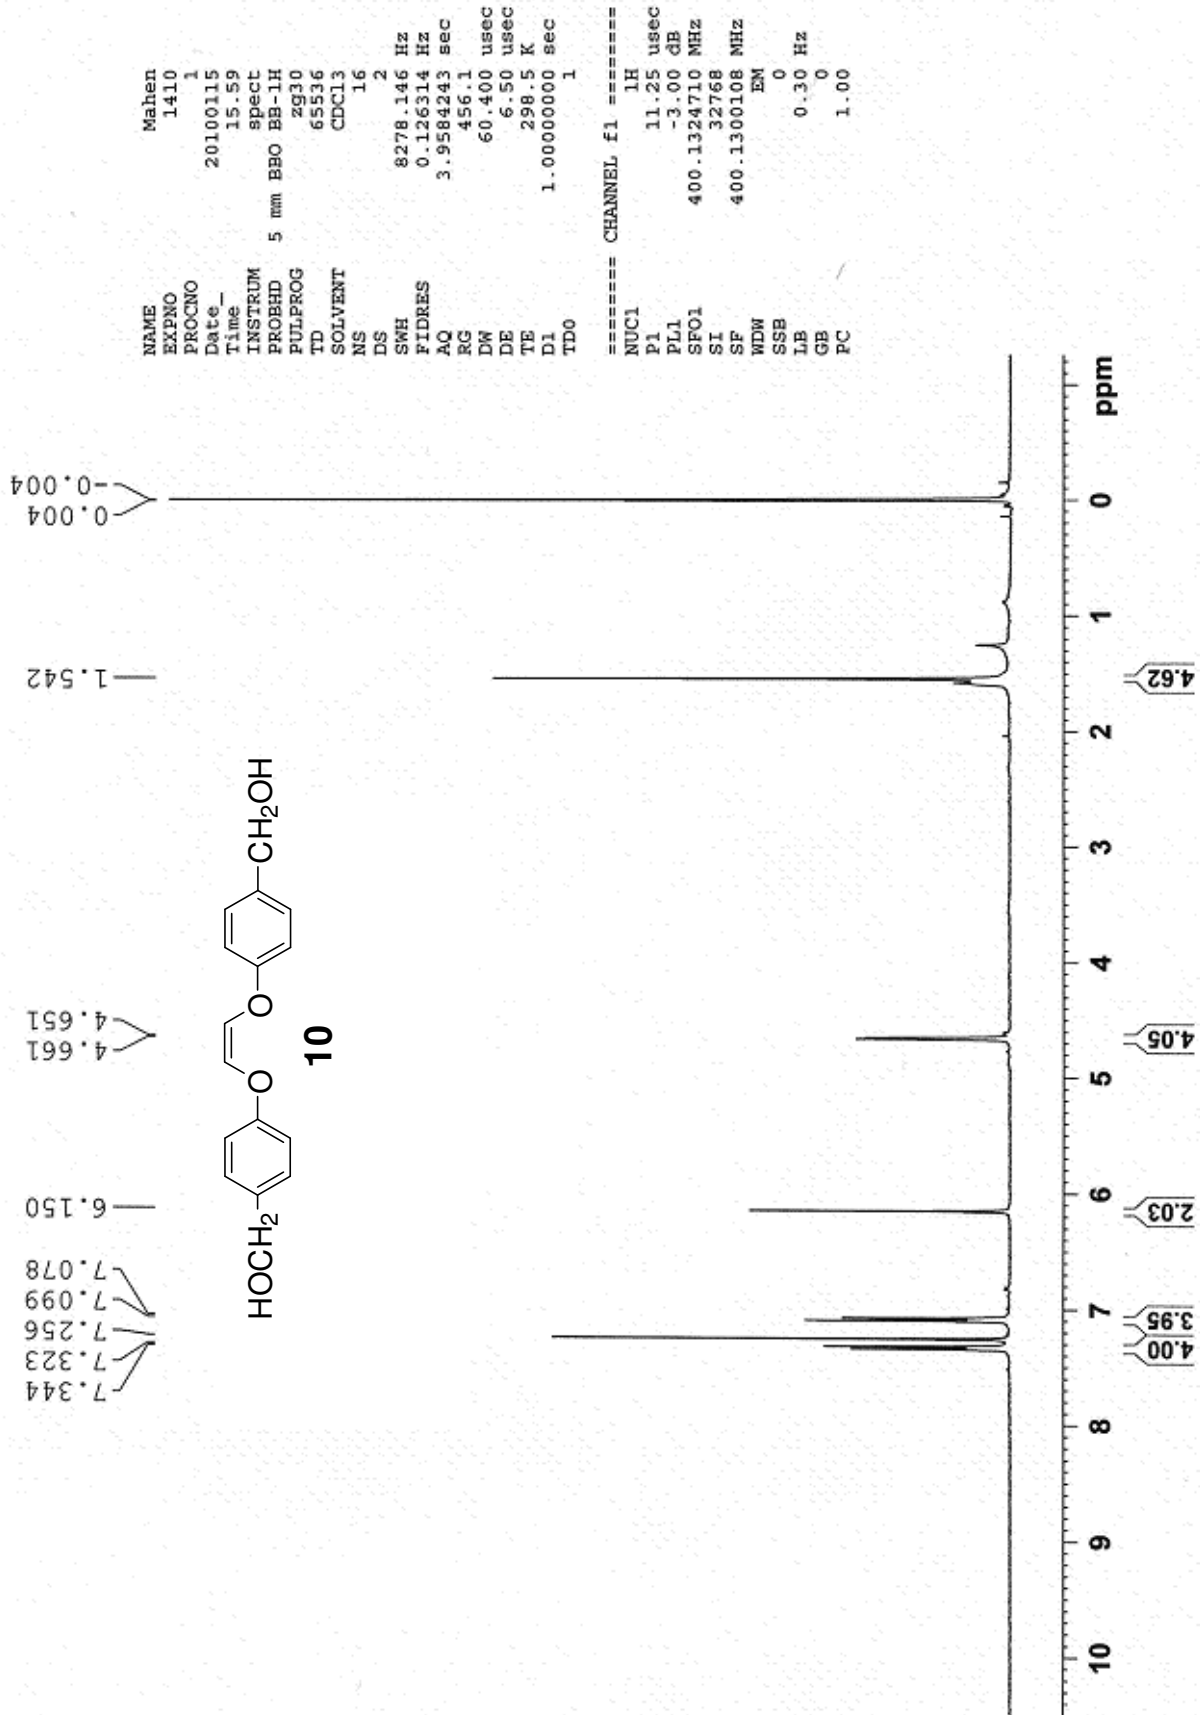

**Figure S12.** <sup>1</sup>H NMR of (Z)-(4,4'-(ethene-1,2-diylbis(oxy))bis(1,4-phenylene))-dimethanol (**10**) in CDCl<sub>3</sub>.

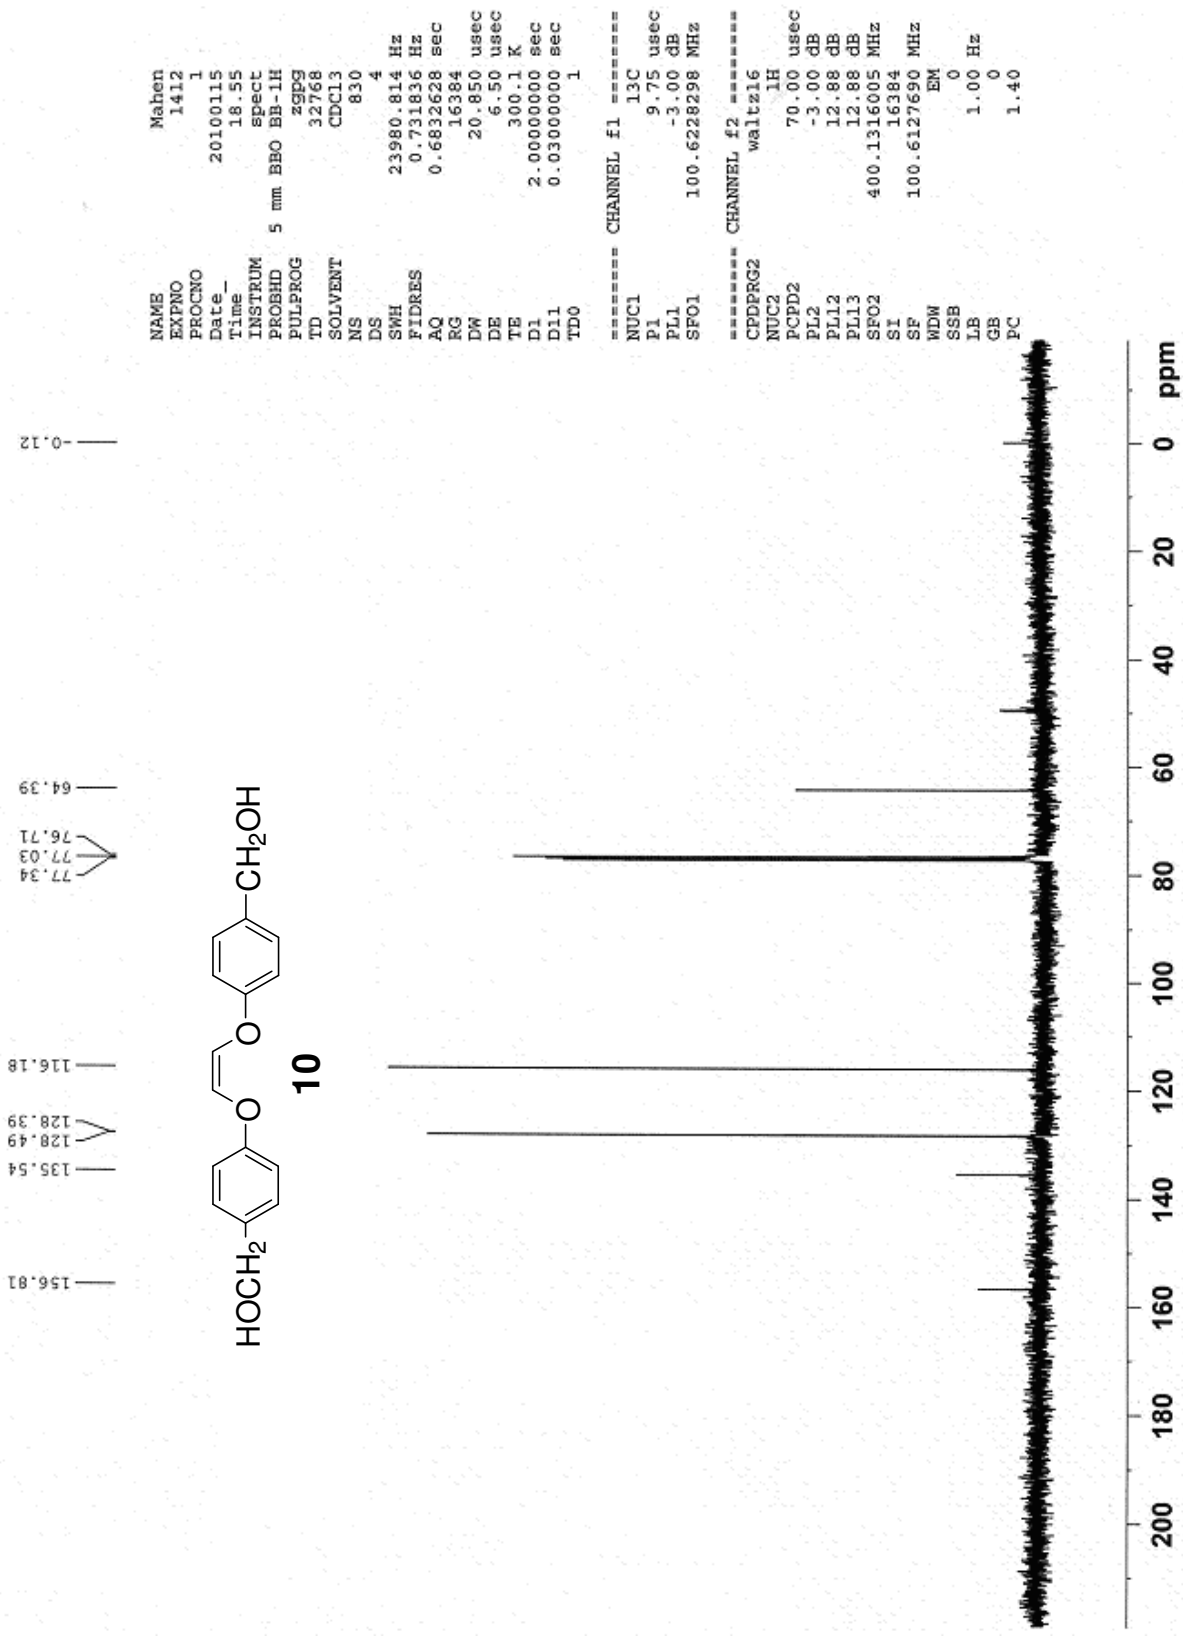

**Figure S13.** <sup>13</sup>C NMR of (Z)-(4,4'-(ethene-1,2-diylbis(oxy))bis(1,4-phenylene))-dimethanol (**10**) in CDCl<sub>3</sub>.

## Qualitative Compound Report

|                        |                  |                               |                        |
|------------------------|------------------|-------------------------------|------------------------|
| <b>Data File</b>       | MZ20091105_004.d | <b>Sample Name</b>            | Sample 3 (10 mg scale) |
| <b>Sample Type</b>     | Sample           | <b>Position</b>               | P1-F3                  |
| <b>Instrument Name</b> | Instrument 1     | <b>User Name</b>              |                        |
| <b>Acq Method</b>      |                  | <b>IRM Calibration Status</b> | Success                |
| <b>DA Method</b>       | Default.m        | <b>Comment</b>                | EM=272.10 CF=C16H16O4  |

Fragmentor Voltage 175 Collision Energy 0 Ionization Mode Esi

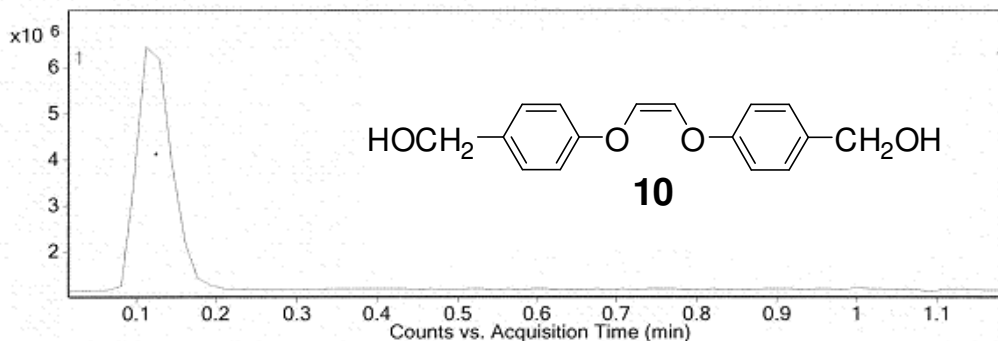

### Compound Table

| Compound Label    | RT  | Mass      | Abund   | Formula    | Tgt Mass  | Diff (ppm) |
|-------------------|-----|-----------|---------|------------|-----------|------------|
| Cpd 1: C16 H16 O4 | 0.1 | 272.10474 | 1881770 | C16 H16 O4 | 272.10486 | -0.43      |

| Compound Label    | RT  | Algorithm       | Mass      |
|-------------------|-----|-----------------|-----------|
| Cpd 1: C16 H16 O4 | 0.1 | Find By Formula | 272.10474 |

### MS Zoomed Spectrum

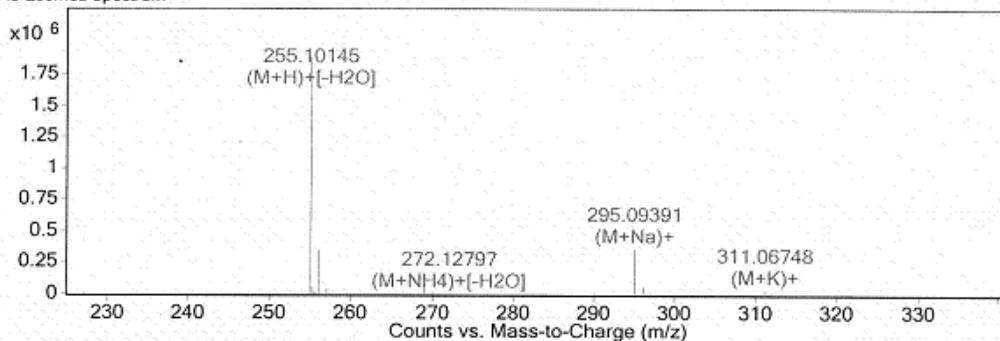

### MS Spectrum Peak List

| m/z       | Calc m/z  | Diff(ppm) | z | Abund   | Formula       | Ion            |
|-----------|-----------|-----------|---|---------|---------------|----------------|
| 255.10145 | 255.10157 | -0.46     |   | 1881770 | C16 H15 O3    | (M+H)+[-H2O]   |
| 255.24356 |           |           |   | 55872   |               |                |
| 255.30133 |           |           |   | 21580   |               |                |
| 256.1049  | 256.10496 | -0.23     |   | 347501  | C16 H15 O3    | (M+H)+[-H2O]   |
| 257.10814 | 257.1076  | 2.1       |   | 43492   | C16 H15 O3    | (M+H)+[-H2O]   |
| 272.12797 | 272.12812 | -0.55     | 1 | 1081    | C16 H18 N O3  | (M+NH4)+[-H2O] |
| 290.13822 | 290.13868 | -1.61     | 1 | 12161   | C16 H20 N O4  | (M+NH4)+       |
| 295.09391 | 295.09408 | -0.57     | 1 | 360920  | C16 H16 Na O4 | (M+Na)+        |
| 296.09698 | 296.09747 | -1.66     | 1 | 62600   | C16 H16 Na O4 | (M+Na)+        |
| 311.06748 | 311.06802 | -1.72     | 1 | 31090   | C16 H16 K O4  | (M+K)+         |

--- End Of Report ---

**Figure S14.** HRMS of (Z)-(4,4'-(ethene-1,2-diylbis(oxy))bis(1,4-phenylene))-dimethanol (**10**).

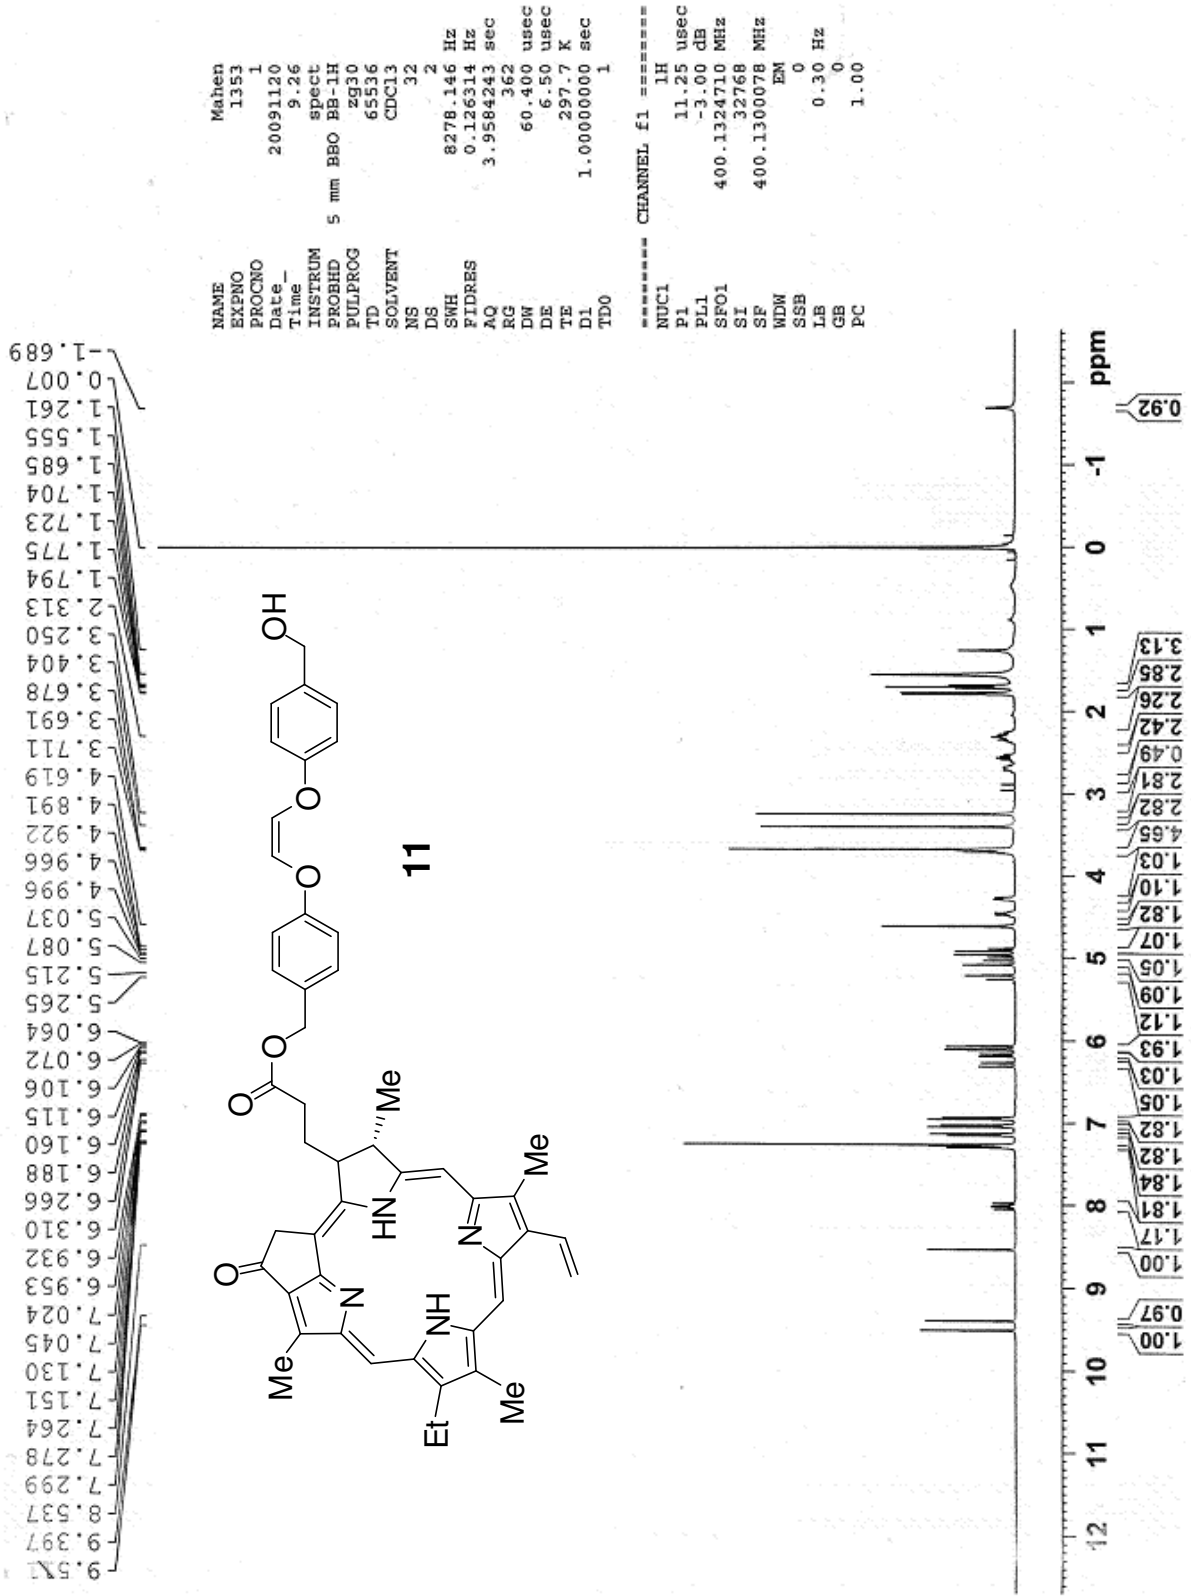

Figure S15. <sup>1</sup>H NMR of (Z)-4-[2-(4-hydroxymethylphenoxy)vinyl]oxy]-benzyl-pyrropeophorbide (**11**) in CDCl<sub>3</sub>.

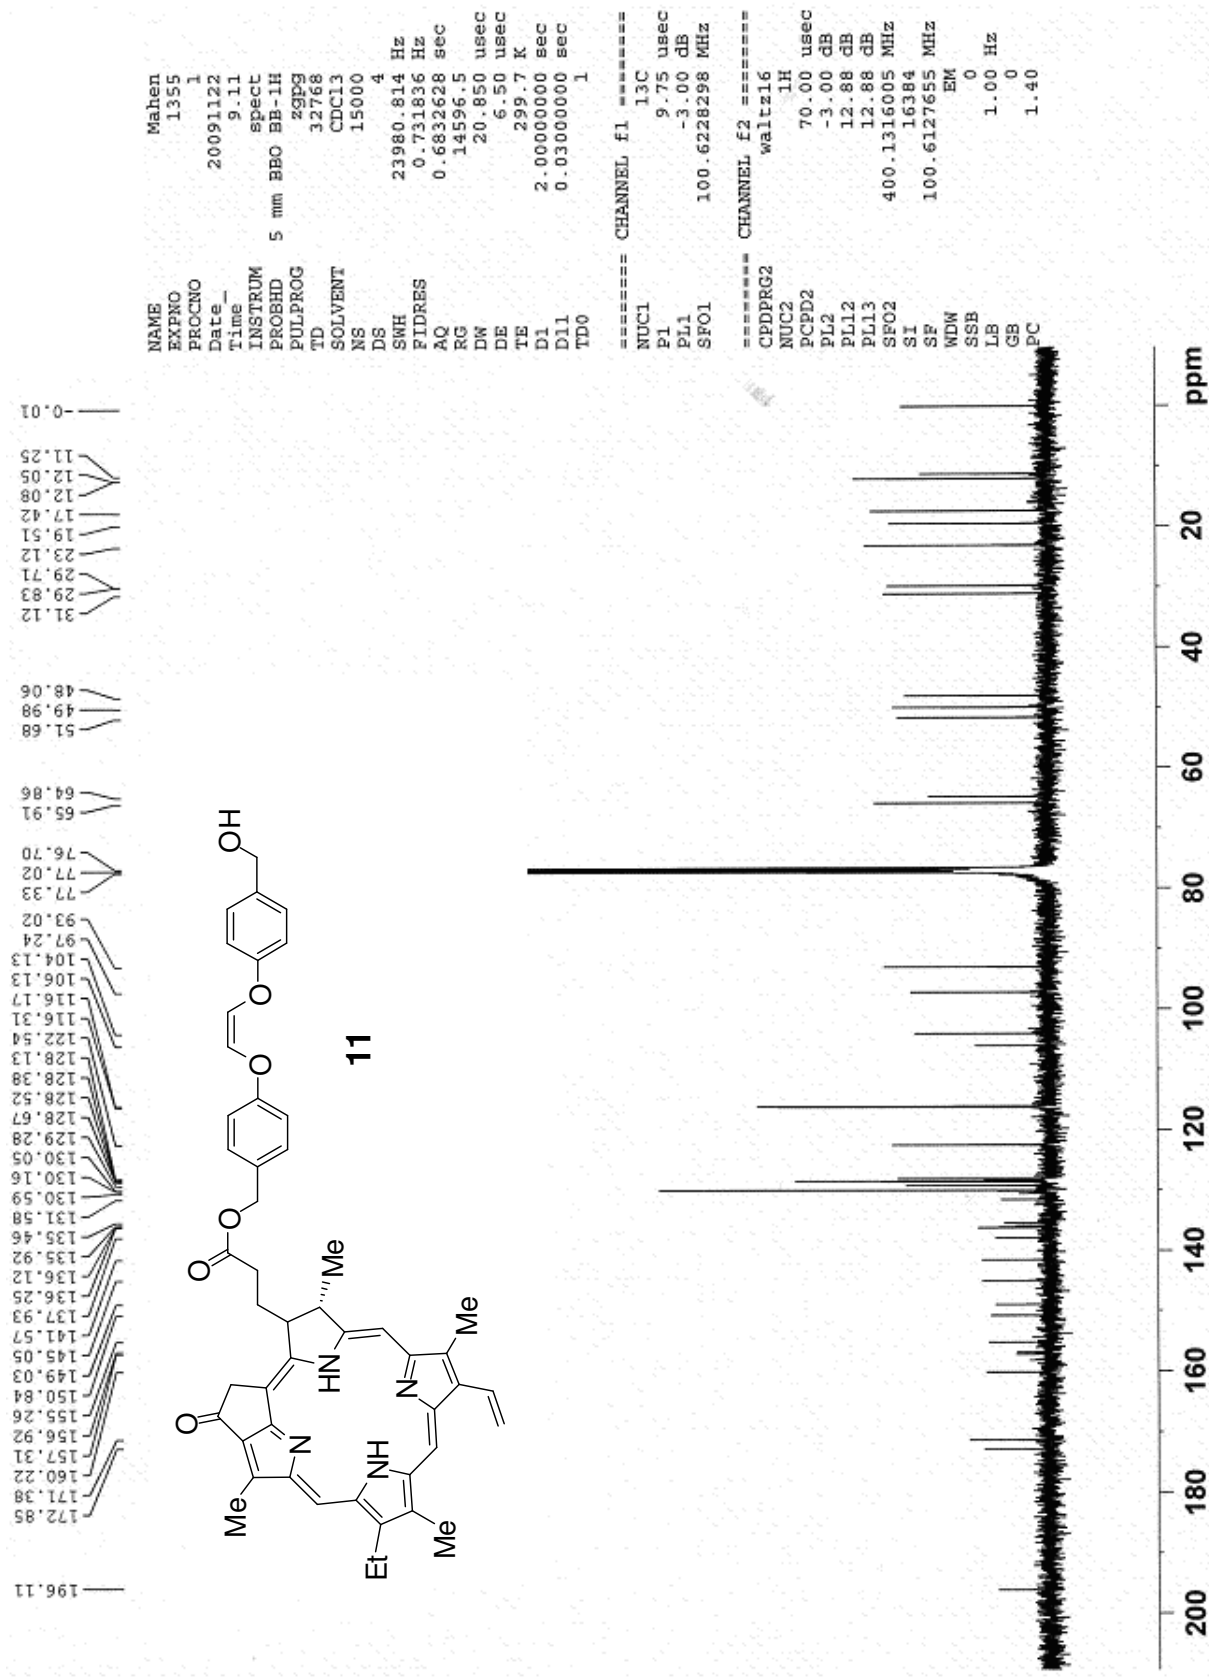

Figure S16. <sup>13</sup>C NMR of (Z)-4-[2-(4-hydroxymethyl-phenoxy)-vinyl]pyrrolophorbide (**11**) in CDCl<sub>3</sub>.

# Qualitative Compound Report

|                        |                  |                               |                              |
|------------------------|------------------|-------------------------------|------------------------------|
| <b>Data File</b>       | MZ20091105_003.d | <b>Sample Name</b>            | Sample 2 (10 mg scale)       |
| <b>Sample Type</b>     | Sample           | <b>Position</b>               | P1-F2                        |
| <b>Instrument Name</b> | Instrument 1     | <b>User Name</b>              |                              |
| <b>Acq Method</b>      |                  | <b>IRM Calibration Status</b> | Success                      |
| <b>DA Method</b>       | Default.m        | <b>Comment</b>                | EM=788.3574<br>CF=C49H48N4O6 |

Fragmentor Voltage 175 Collision Energy 0 Ionization Mode Esi

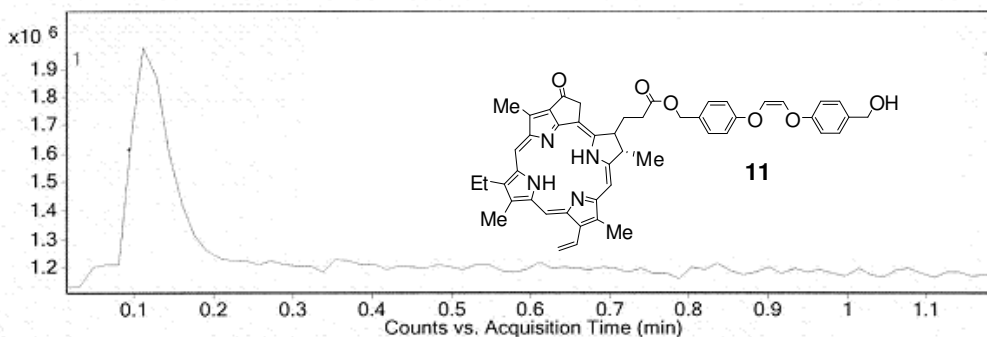

### Compound Table

| Compound Label       | RT  | Mass      | Abund | Formula       | Tgt Mass  | Diff (ppm) |
|----------------------|-----|-----------|-------|---------------|-----------|------------|
| Cpd 1: C49 H48 N4 O6 | 0.1 | 788.35616 | 35578 | C49 H48 N4 O6 | 788.35739 | -1.55      |

| Compound Label       | RT  | Algorithm       | Mass      |
|----------------------|-----|-----------------|-----------|
| Cpd 1: C49 H48 N4 O6 | 0.1 | Find By Formula | 788.35616 |

### MS Zoomed Spectrum

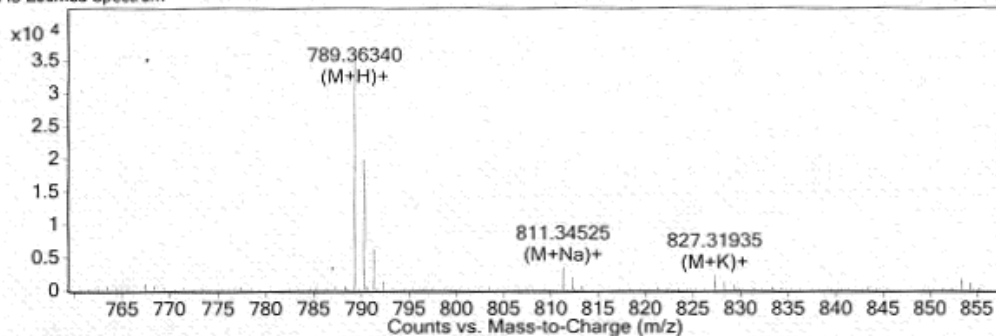

### MS Spectrum Peak List

| m/z       | Calc m/z  | Diff(ppm) | z | Abund | Formula          | Ion     |
|-----------|-----------|-----------|---|-------|------------------|---------|
| 787.38112 |           |           |   | 669   |                  |         |
| 789.3634  | 789.36466 | -1.6      |   | 35578 | C49 H49 N4 O6    | (M+H)+  |
| 790.36687 | 790.36788 | -1.29     |   | 19757 | C49 H49 N4 O6    | (M+H)+  |
| 791.3704  | 791.37093 | -0.67     |   | 6178  | C49 H49 N4 O6    | (M+H)+  |
| 792.37633 | 792.37387 | 3.1       |   | 1377  | C49 H49 N4 O6    | (M+H)+  |
| 811.34525 | 811.34661 | -1.68     | 1 | 3380  | C49 H48 N4 Na O6 | (M+Na)+ |
| 812.34956 | 812.34983 | -0.33     | 1 | 1986  | C49 H48 N4 Na O6 | (M+Na)+ |
| 827.31935 | 827.32054 | -1.44     | 1 | 2256  | C49 H48 K N4 O6  | (M+K)+  |
| 828.32549 | 828.32376 | 2.09      | 1 | 1141  | C49 H48 K N4 O6  | (M+K)+  |
| 829.32356 | 829.3243  | -0.89     | 1 | 799   | C49 H48 K N4 O6  | (M+K)+  |

--- End Of Report ---

**Figure S17.** HRMS of (Z)-4-[2-(4-hydroxymethyl-phenoxy)-vinyl]oxy]-benzyl-pyrropeophorbide (**11**).

## Qualitative Compound Report

| Compound Label             | RT   | Algorithm       | Mass      |
|----------------------------|------|-----------------|-----------|
| Cpd 2: C40 H40 N4 O4; 2.08 | 2.08 | Find By Formula | 640.30482 |

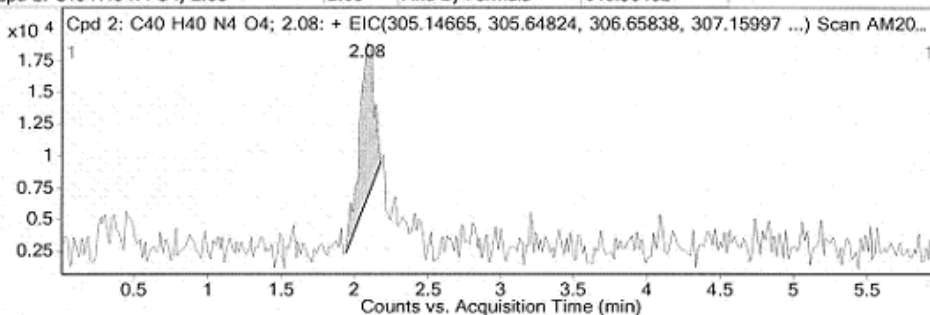

MS Spectrum

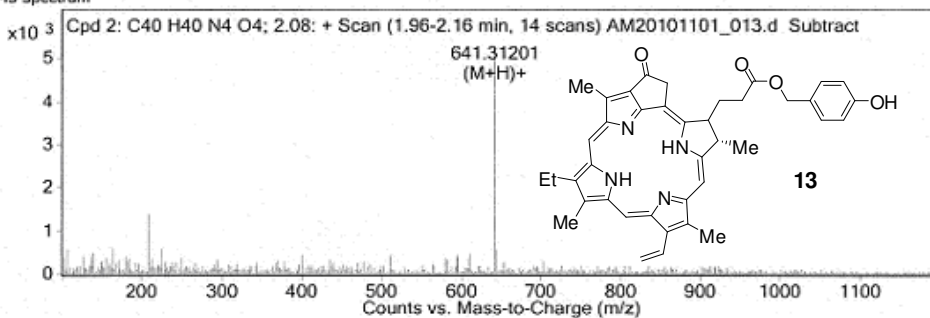

MS Zoomed Spectrum

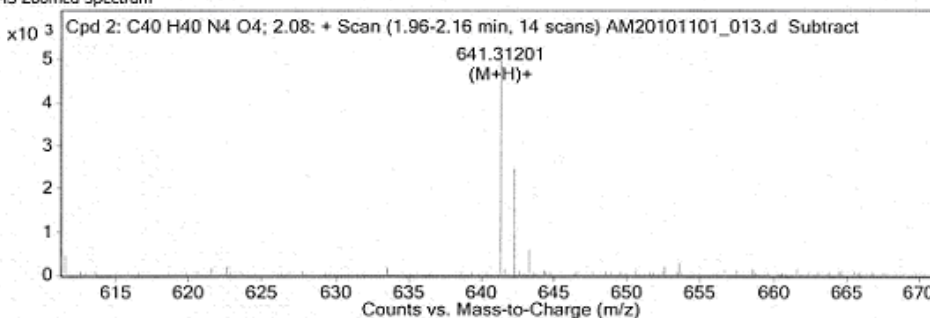

MS Spectrum Peak List

| m/z       | Calc m/z  | Diff(ppm) | Abund | Formula       | Ion                |
|-----------|-----------|-----------|-------|---------------|--------------------|
| 639.28649 |           |           | 50    |               |                    |
| 641.31201 | 641.31223 | -0.34     | 5088  | C40 H41 N4 O4 | (M+H) <sup>+</sup> |
| 641.53729 |           |           | 144   |               |                    |
| 642.31595 | 642.31542 | 0.83      | 2457  | C40 H41 N4 O4 | (M+H) <sup>+</sup> |
| 642.59513 |           |           | 83    |               |                    |
| 643.31965 | 643.31844 | 1.88      | 586   | C40 H41 N4 O4 | (M+H) <sup>+</sup> |
| 643.55817 |           |           | 61    |               |                    |
| 644.31864 | 644.32134 | -4.2      | 101   | C40 H41 N4 O4 | (M+H) <sup>+</sup> |
| 644.34972 |           |           | 75    |               |                    |
| 644.75786 |           |           | 49    |               |                    |

Figure S18. HRMS of 4-hydroxybenzyl-pyropheorbide (13).

## Qualitative Compound Report

|                 |                            |                        |                                                |
|-----------------|----------------------------|------------------------|------------------------------------------------|
| Data File       | AM20101027_009.d           | Sample Name            | Photocleaved product in MeOH pH=8 after 24 hrs |
| Sample Type     | Sample                     | Position               | P1-F5                                          |
| Instrument Name | Instrument 1               | User Name              |                                                |
| Acq Method      | MahencolumnPhotocleavage.m | IRM Calibration Status | Success                                        |
| DA Method       | MahenJAD_DNA.m             | Comment                |                                                |

### Compound Table

| Compound Label             | RT   | Mass      | Abund | Formula       | Tgt Mass  | Diff (ppm) |
|----------------------------|------|-----------|-------|---------------|-----------|------------|
| Cpd 1: C33 H34 N4 O3; 2.05 | 2.05 | 534.26313 | 65577 | C33 H34 N4 O3 | 534.26309 | 0.08       |

| Compound Label             | RT   | Algorithm       | Mass      |
|----------------------------|------|-----------------|-----------|
| Cpd 1: C33 H34 N4 O3; 2.05 | 2.05 | Find By Formula | 534.26313 |

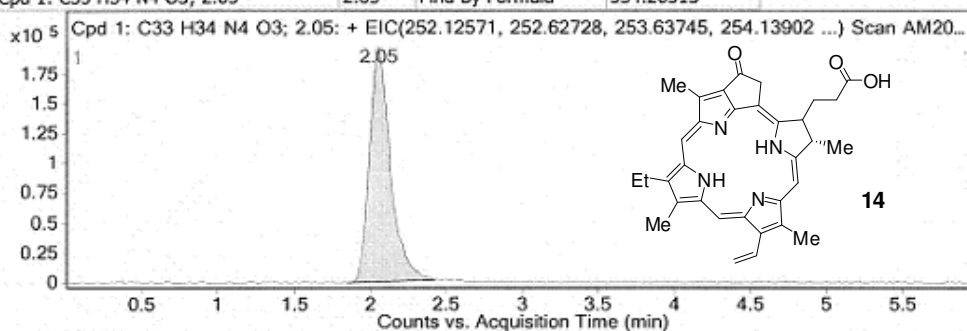

### MS Spectrum

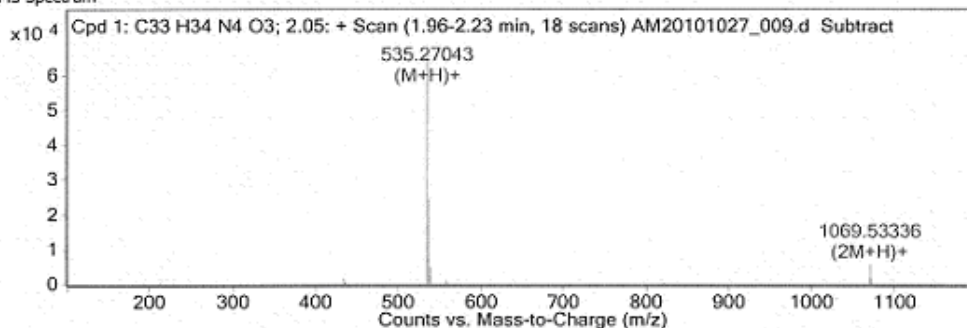

### MS Spectrum Peak List

| m/z        | Calc m/z   | Diff(ppm) | z | Abund | Formula          | Ion      |
|------------|------------|-----------|---|-------|------------------|----------|
| 534.26191  |            |           |   | 614   |                  |          |
| 535.27043  | 535.27037  | 0.12      |   | 65577 | C33 H35 N4 O3    | (M+H)+   |
| 536.27306  | 536.27351  | -0.83     |   | 24393 | C33 H35 N4 O3    | (M+H)+   |
| 537.27605  | 537.27648  | -0.8      |   | 4994  | C33 H35 N4 O3    | (M+H)+   |
| 538.27683  | 538.27933  | -4.64     |   | 846   | C33 H35 N4 O3    | (M+H)+   |
| 557.25077  | 557.25231  | -2.77     | 1 | 994   | C33 H34 N4 Na O3 | (M+Na)+  |
| 1069.53336 | 1069.53346 | -0.09     | 1 | 5542  | C66 H69 N8 O6    | (2M+H)+  |
| 1070.53796 | 1070.5366  | 1.27      | 1 | 4008  | C66 H69 N8 O6    | (2M+H)+  |
| 1071.53962 | 1071.53965 | -0.03     | 1 | 1616  | C66 H69 N8 O6    | (2M+H)+  |
| 1091.51579 | 1091.5154  | 0.36      | 1 | 132   | C66 H68 N8 Na O6 | (2M+Na)+ |

--- End Of Report ---

Figure S19. HRMS of pyropheophorbide-a (14).



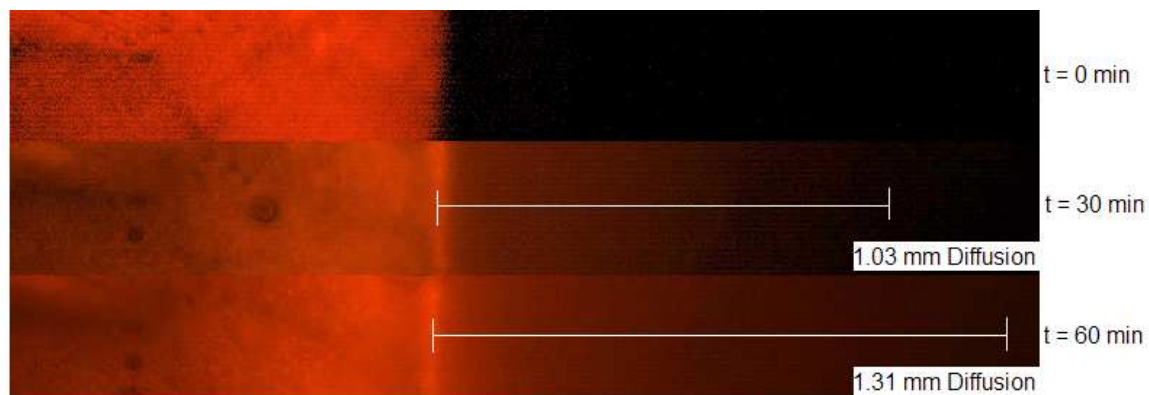

**Figure S20.** Images taken at 4 $\times$  magnification with the epifluorescence microscope of the diffusion of photosensitizer **3** away from glass cap into petrolatum at 65  $^{\circ}$ C at 0, 30 and 60 min with white light irradiation through the fiber optic device.

## References

1. Polívka, T.; Pellnor, M.; Melo, E.; Pascher, T.; Sundström, V.; Osuka, A.; Naqvi, R. K. *J. Phys. Chem. C* **2007**, *111*, 467-476.
2. Dargiewicz, J.; Makarska, M.; Radzki, S. *Colloids Surface A: Physicochem. Eng. Aspects* **2002**, *208*, 159-165.
3. Anvir, D.; Levy, D.; Reisfed, R. *J. Phys. Chem.* **1984**, *88*, 5956-5959.
4. Yang, J.; Bauld, N. L. *J. Org. Chem.* **1999**, *64*, 9251-9253.
